# Supplementary material for: Zwitterionic group 4 aminophenolate catalysts for the polymerization of lactides and ethylene
Source: Royal Society of Chemistry journal article supplement (doi:10.1039/c5nj00486a), 2015-01-01
Supplement: c5nj00486a1.pdf [file c5nj00486a1.pdf]

## Supporting Information

# Zwitterionic group 4 aminophenolate catalysts for the polymerization of lactides and ethylene

Sagnik K. Roymuhury,<sup>a</sup> Debashis Chakraborty,<sup>\*a</sup> and Venkatachalam Ramkumar<sup>b</sup>

<sup>a</sup>Department of Chemistry, Indian Institute of Technology Patna, Patna-800 013, Bihar, India

<sup>b</sup>Department of Chemistry, Indian Institute of Technology Madras, Chennai-600 036, Tamil  
Nadu, India

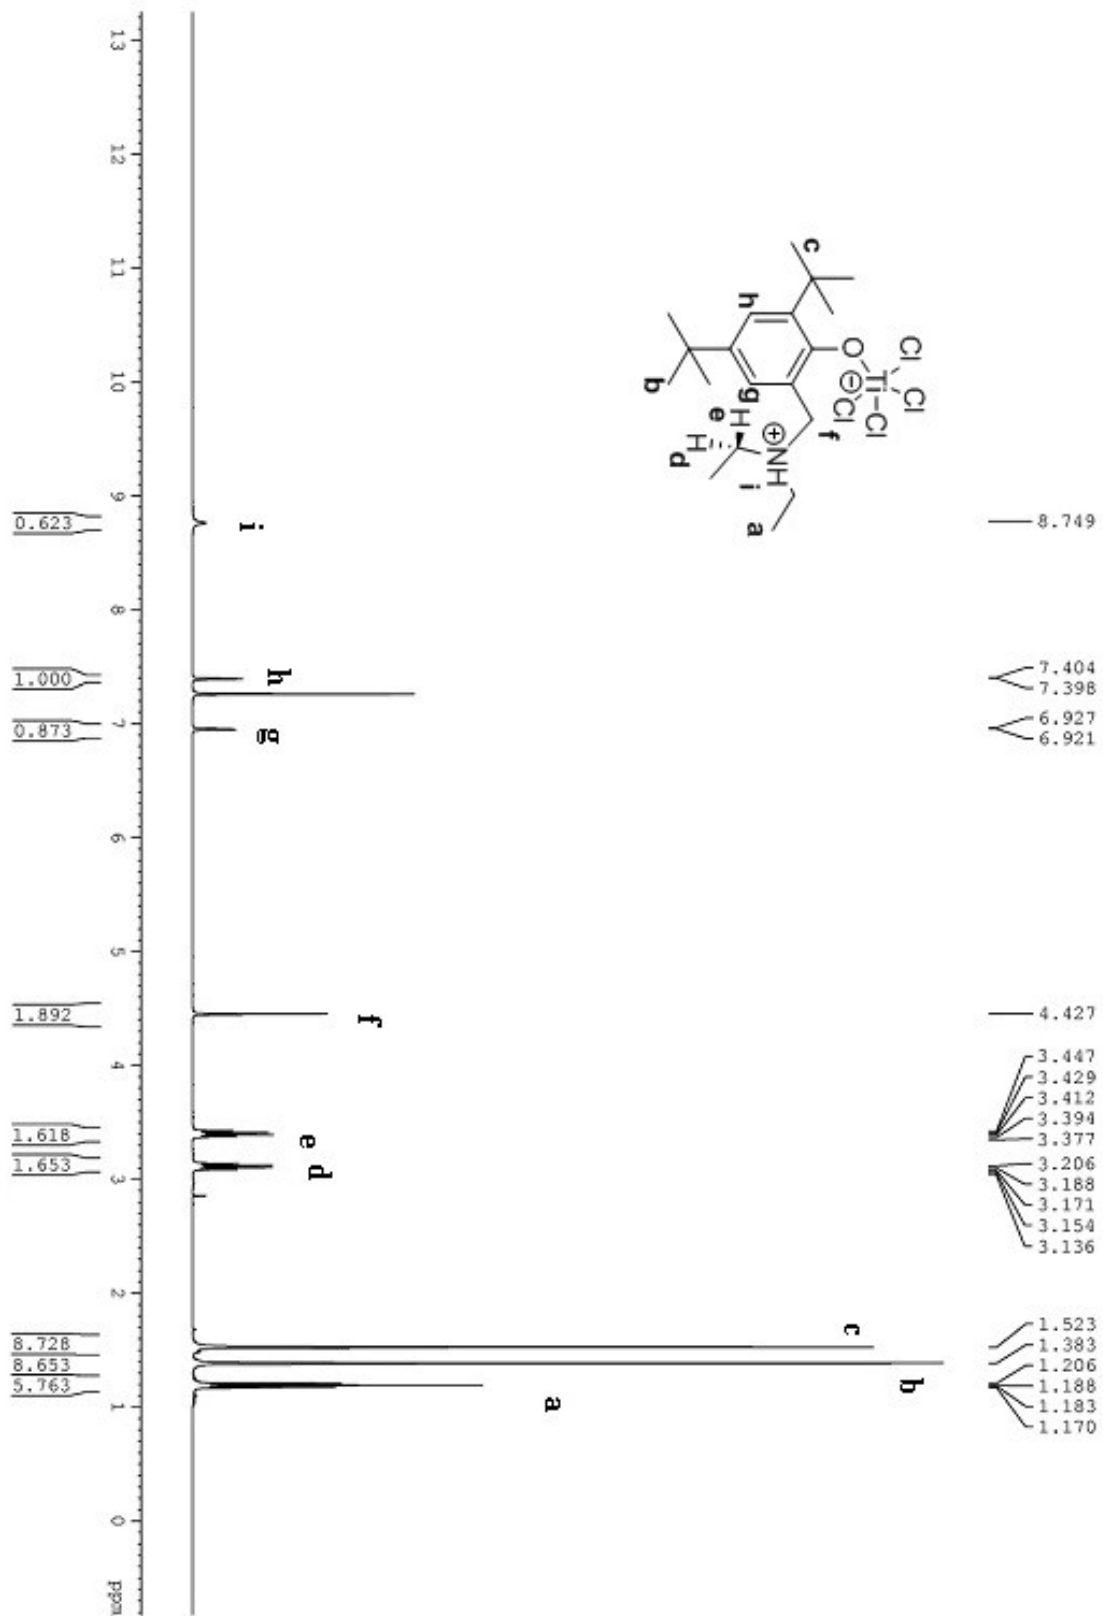

Figure S1. <sup>1</sup>H NMR (400 MHz, CDCl<sub>3</sub>) of Compound 1

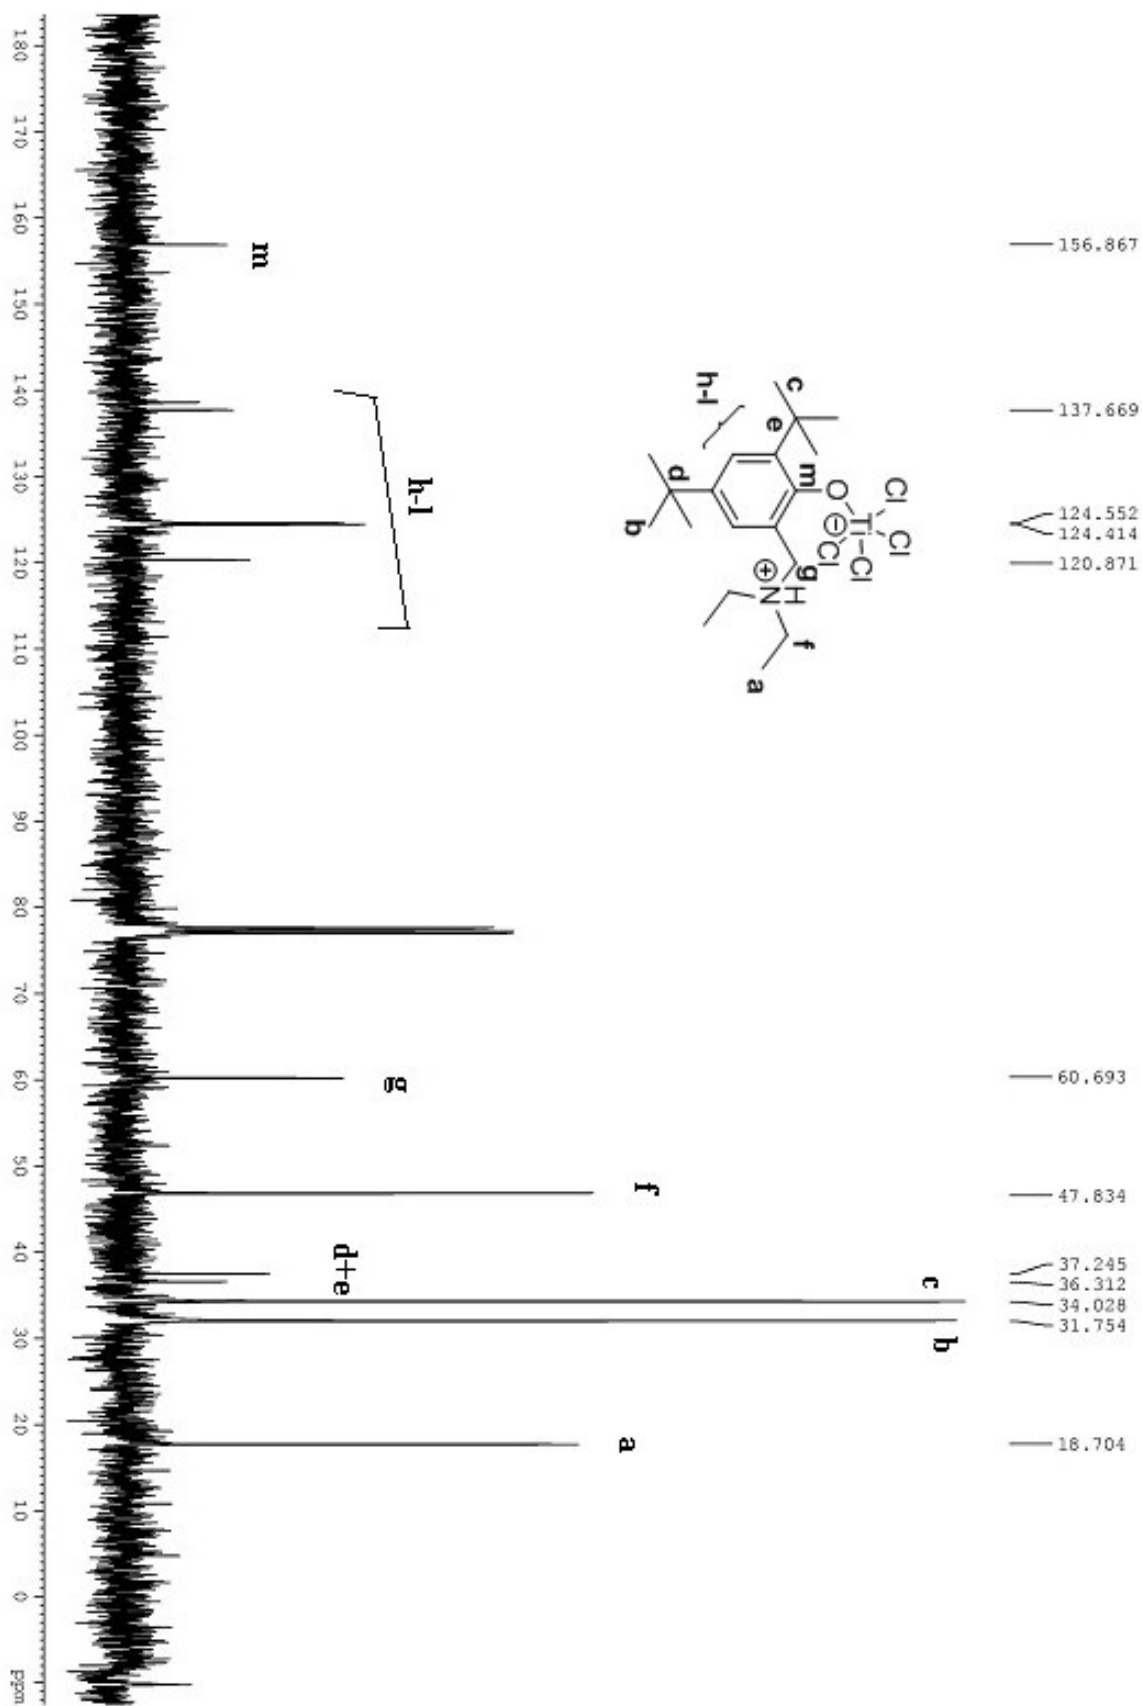

Figure S2.  $^{13}\text{C}$  NMR (100 MHz,  $\text{CDCl}_3$ ) of Compound 1

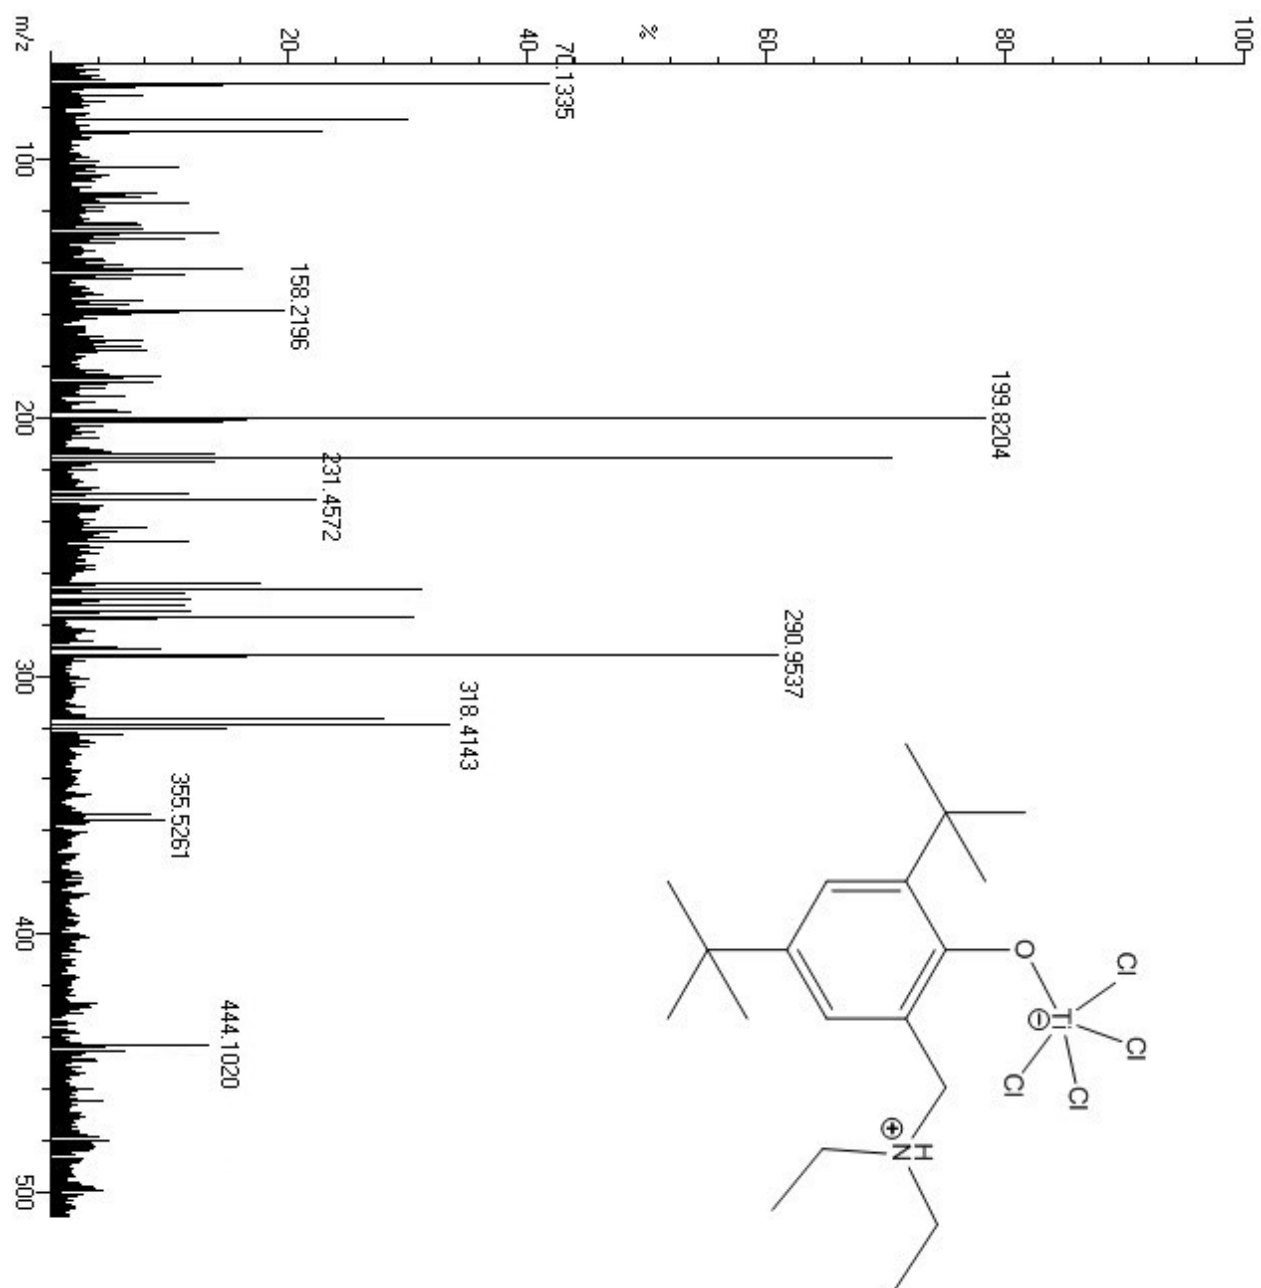

**Figure S3.** ESI mass spectrum of Compound 1

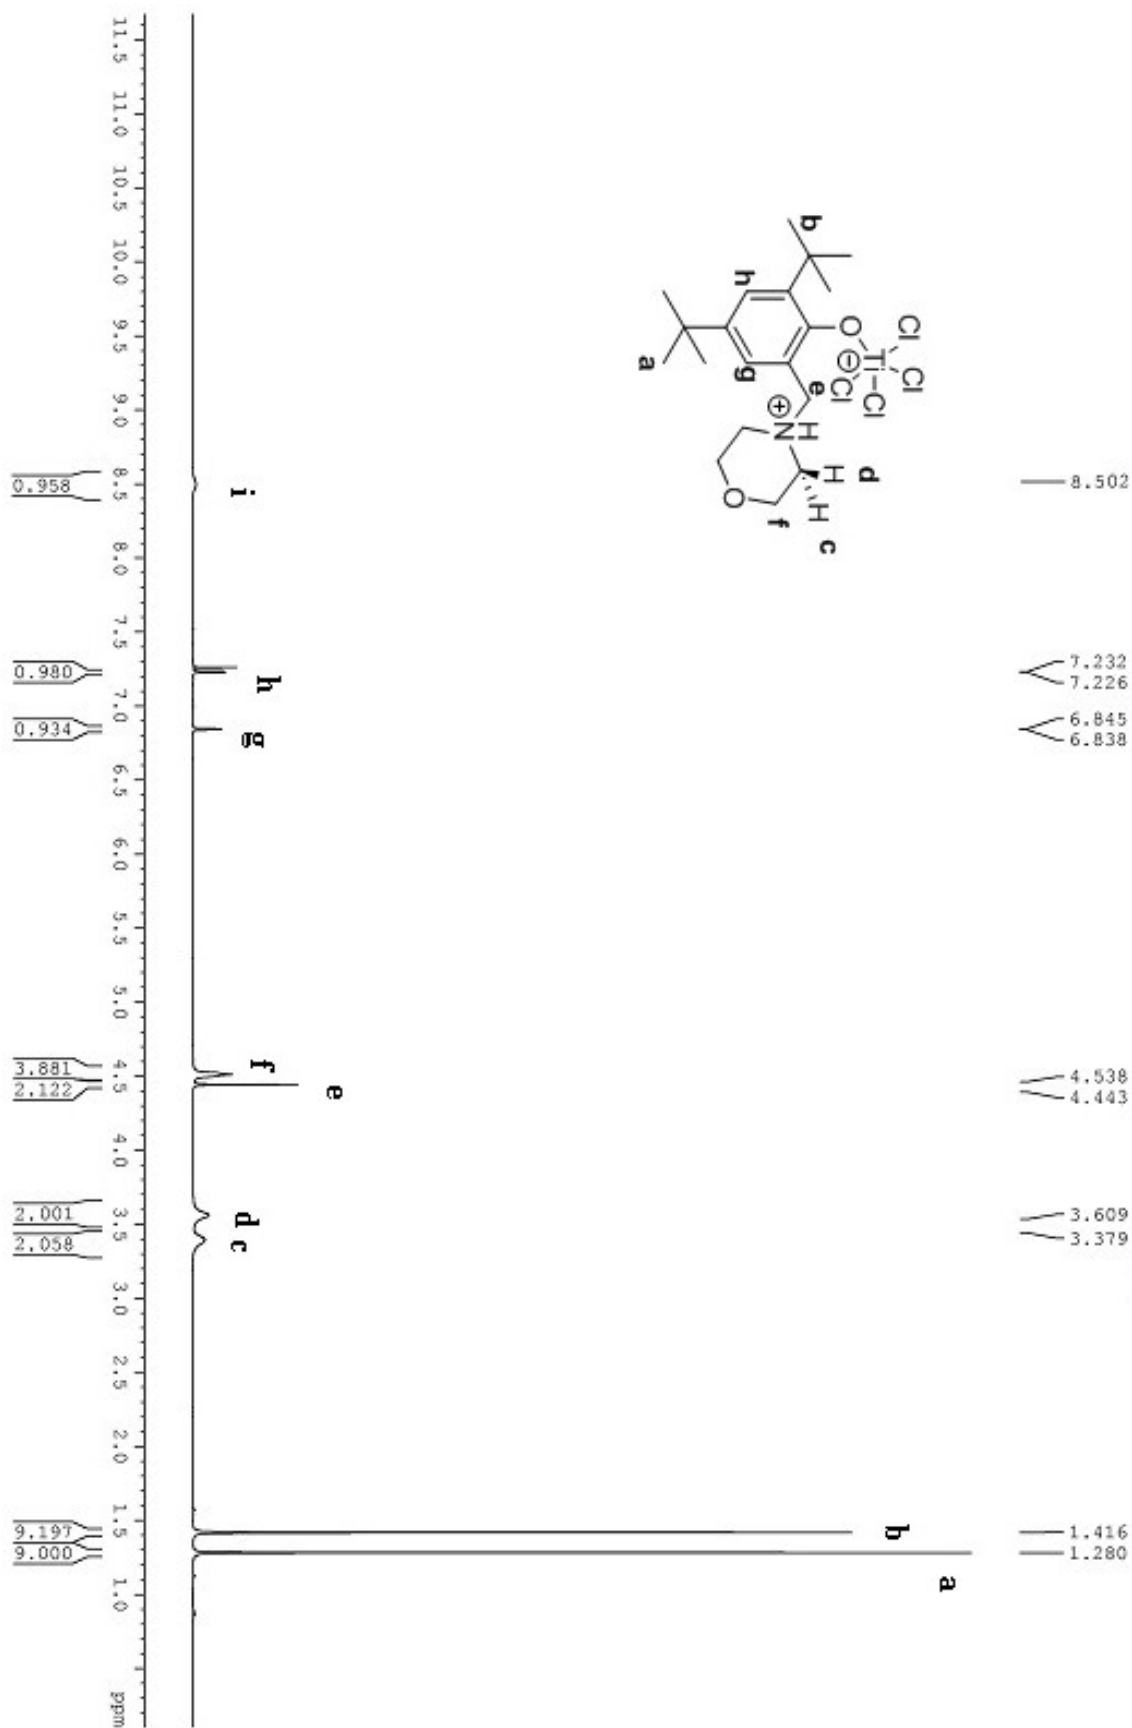

**Figure S4.** <sup>1</sup>H NMR (400 MHz, CDCl<sub>3</sub>) of Compound 2



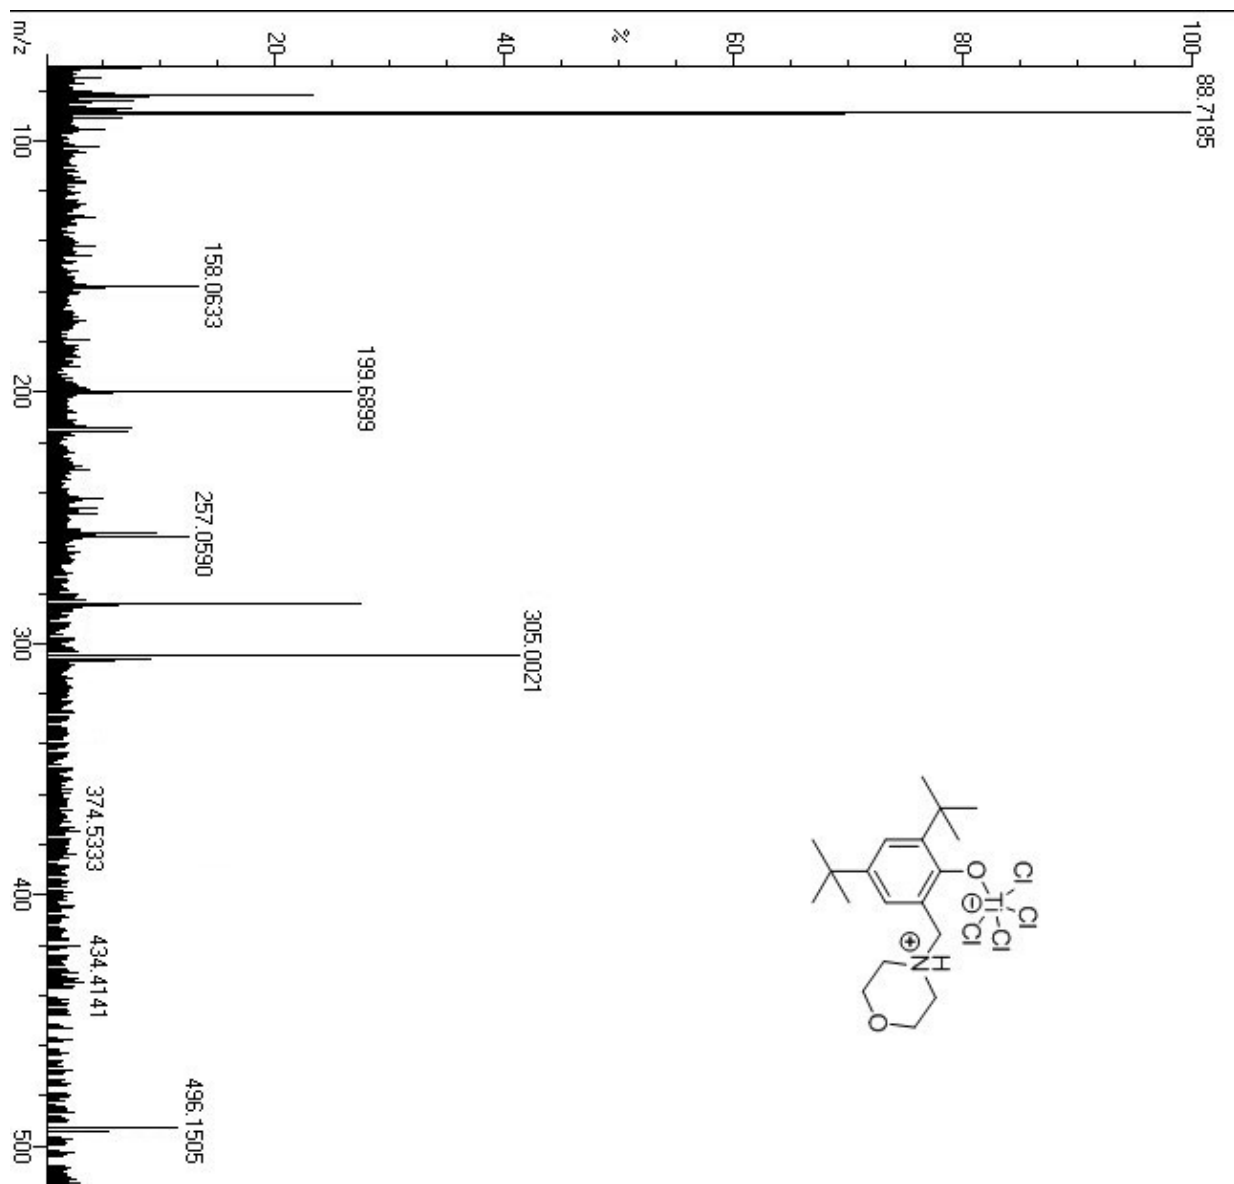

**Figure S6.** ESI mass spectrum of Compound 2

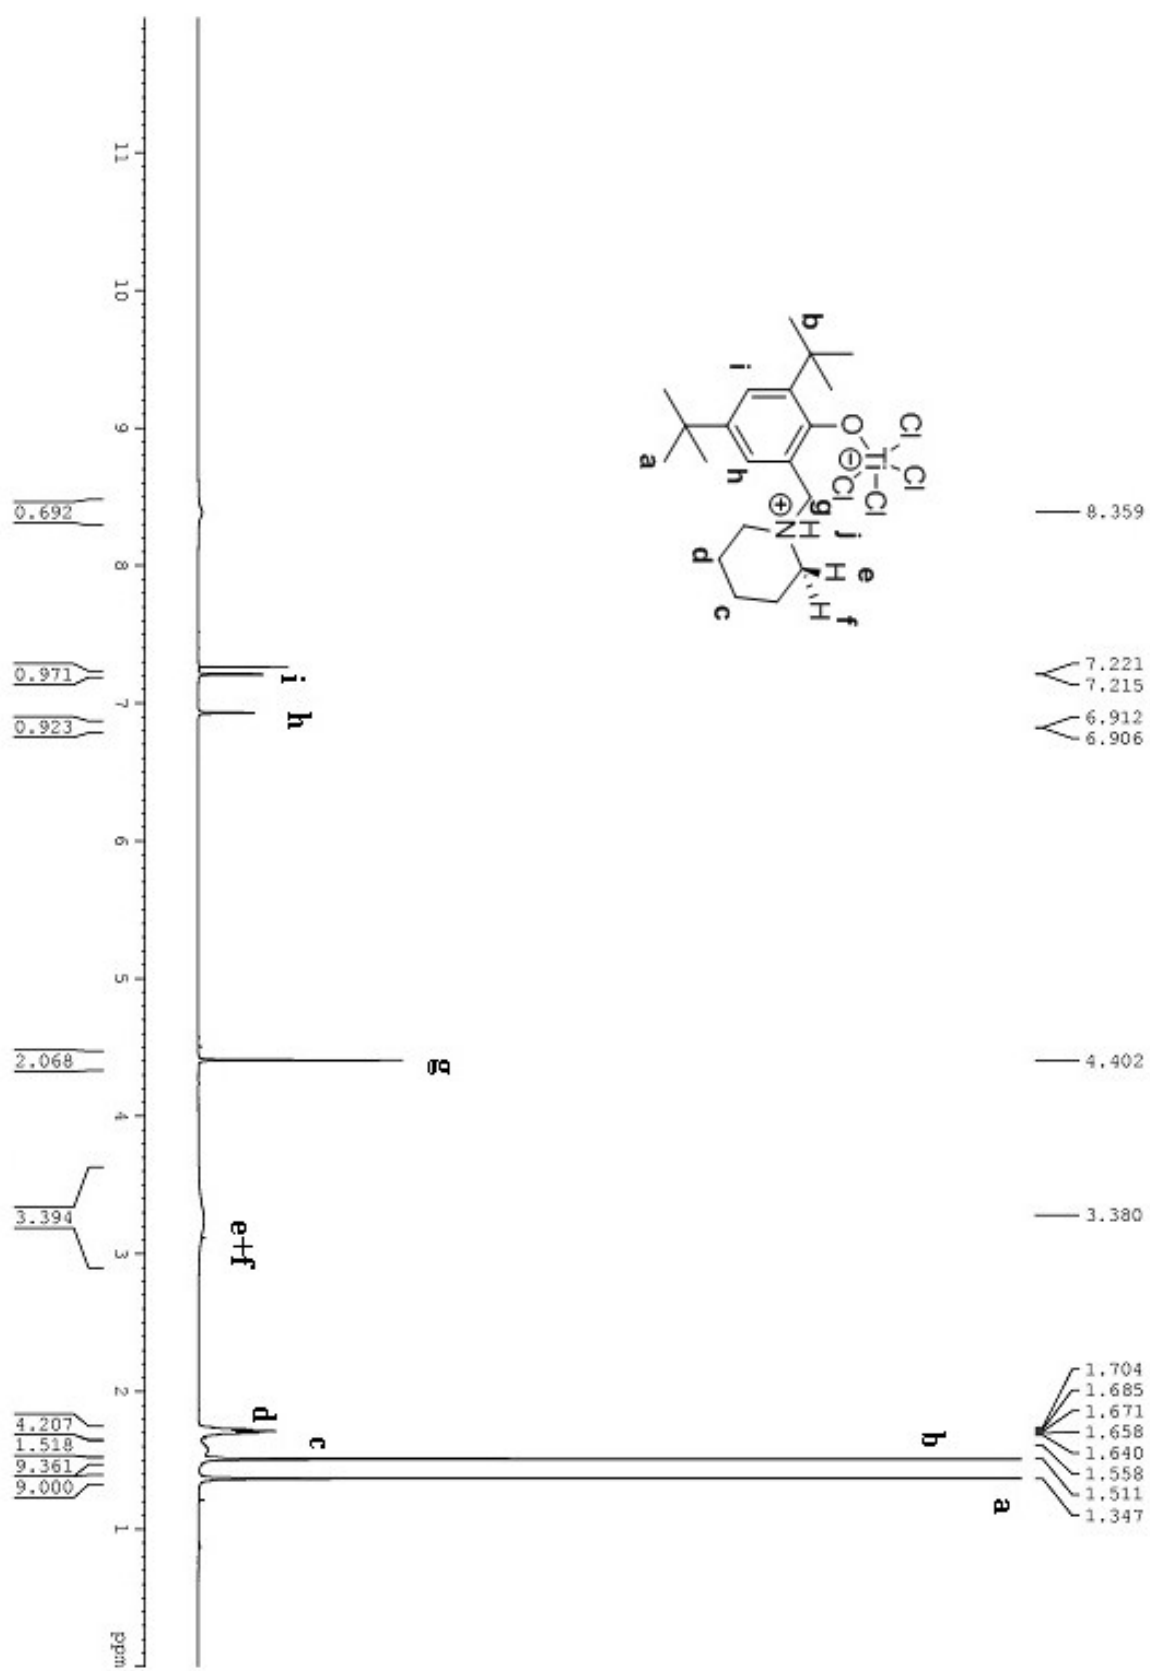

Figure S7. <sup>1</sup>H NMR (400 MHz, CDCl<sub>3</sub>) of Compound 3



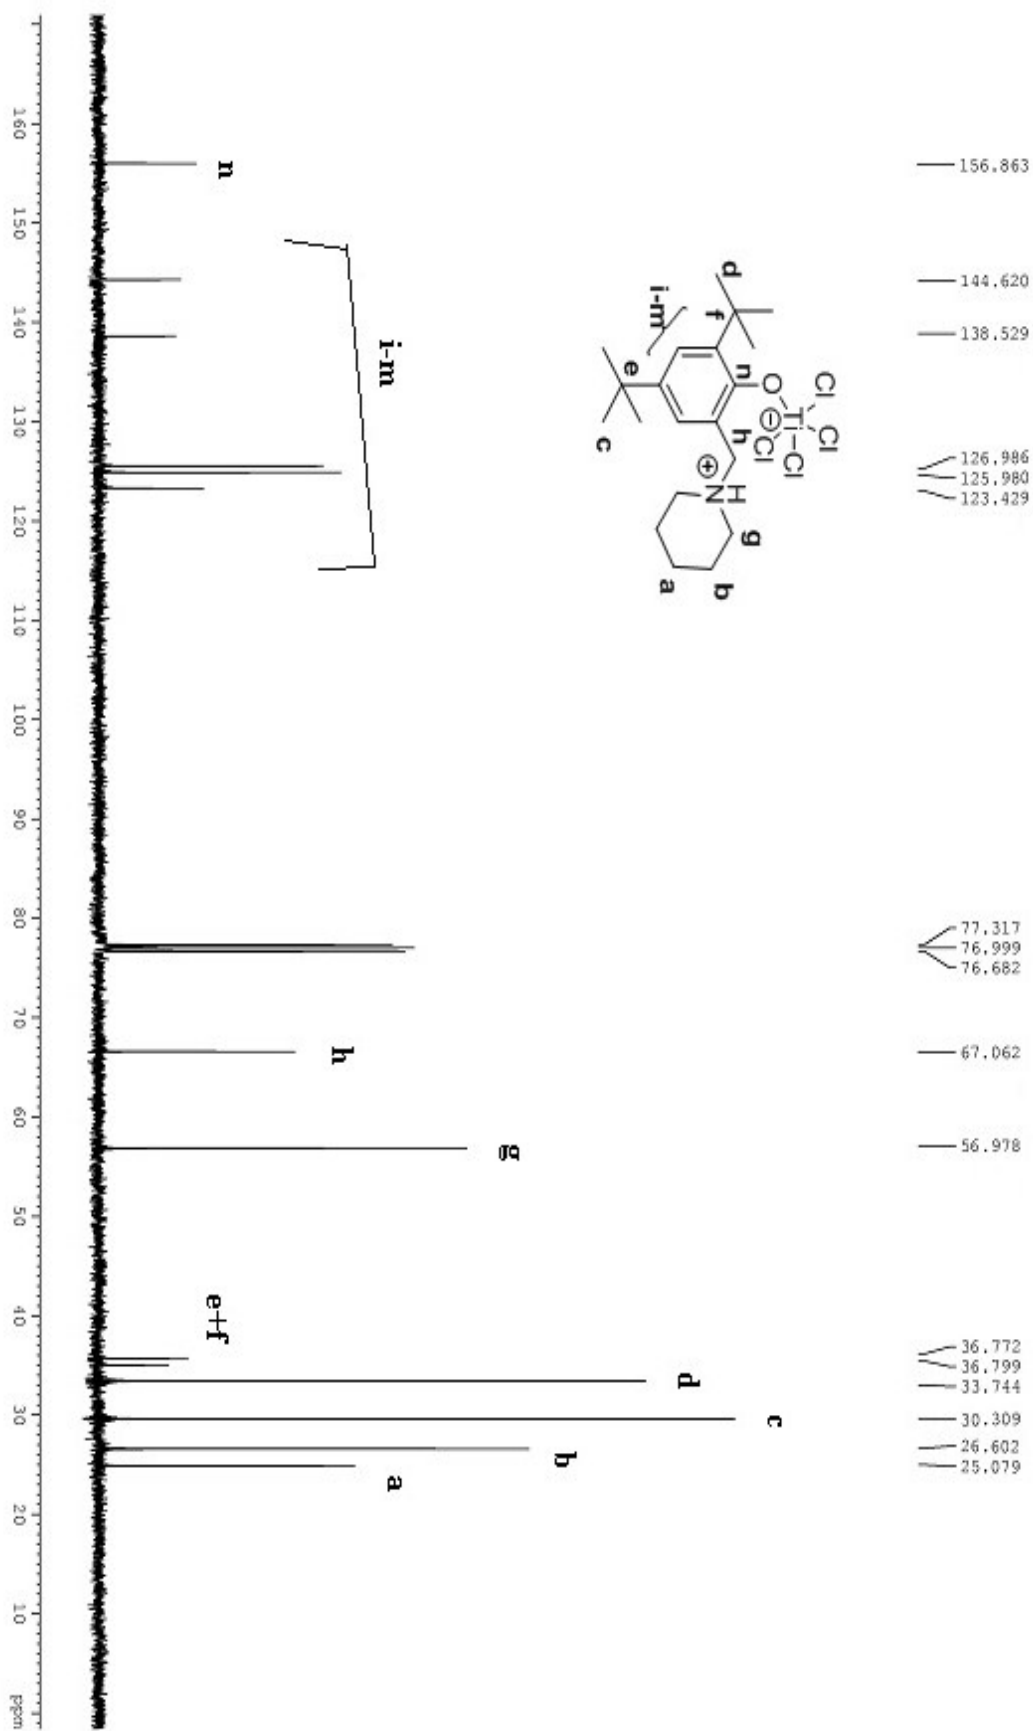

Figure S8. <sup>13</sup>C NMR (100 MHz, CDCl<sub>3</sub>) of Compound 3

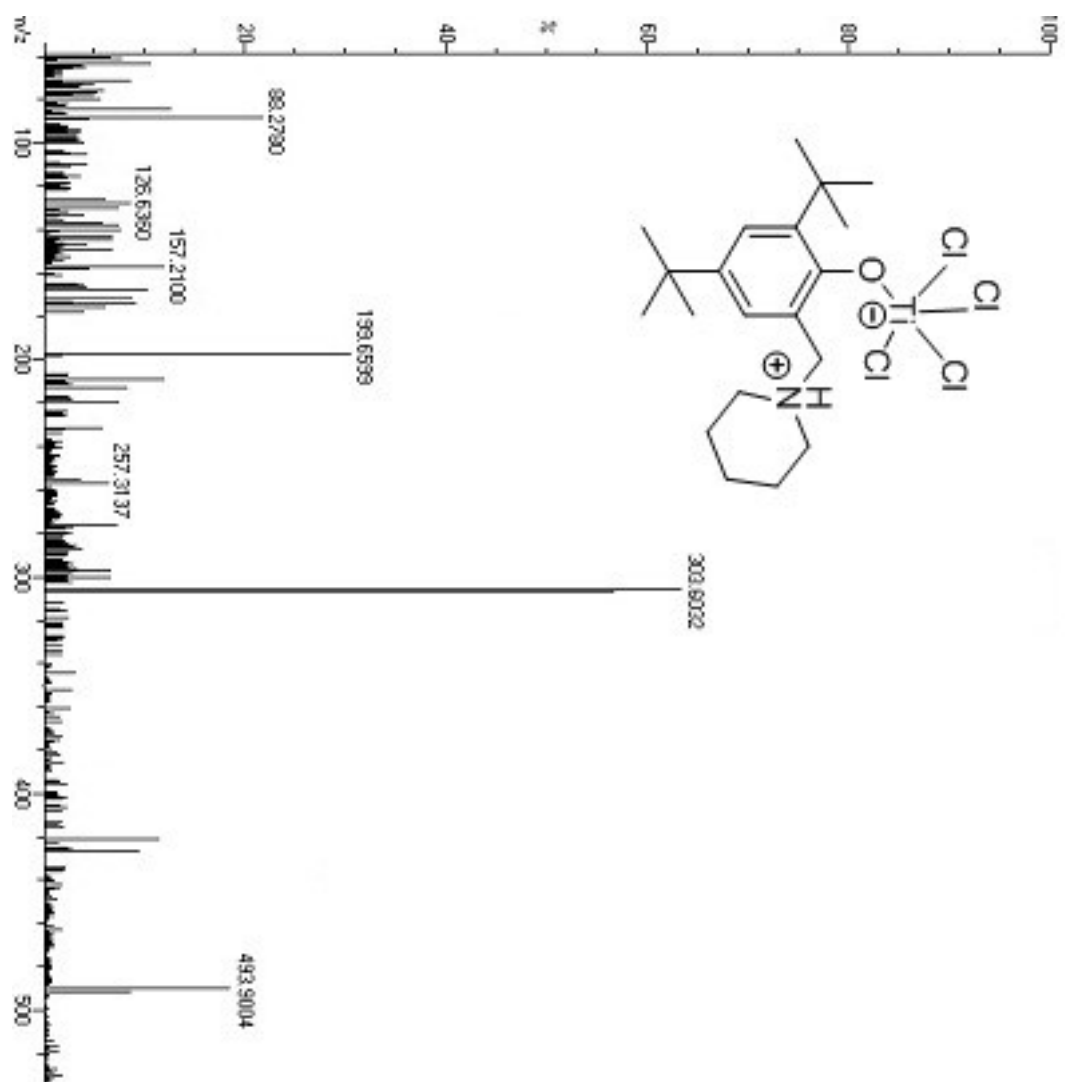

**Figure S9.** ESI mass spectrum of Compound 3

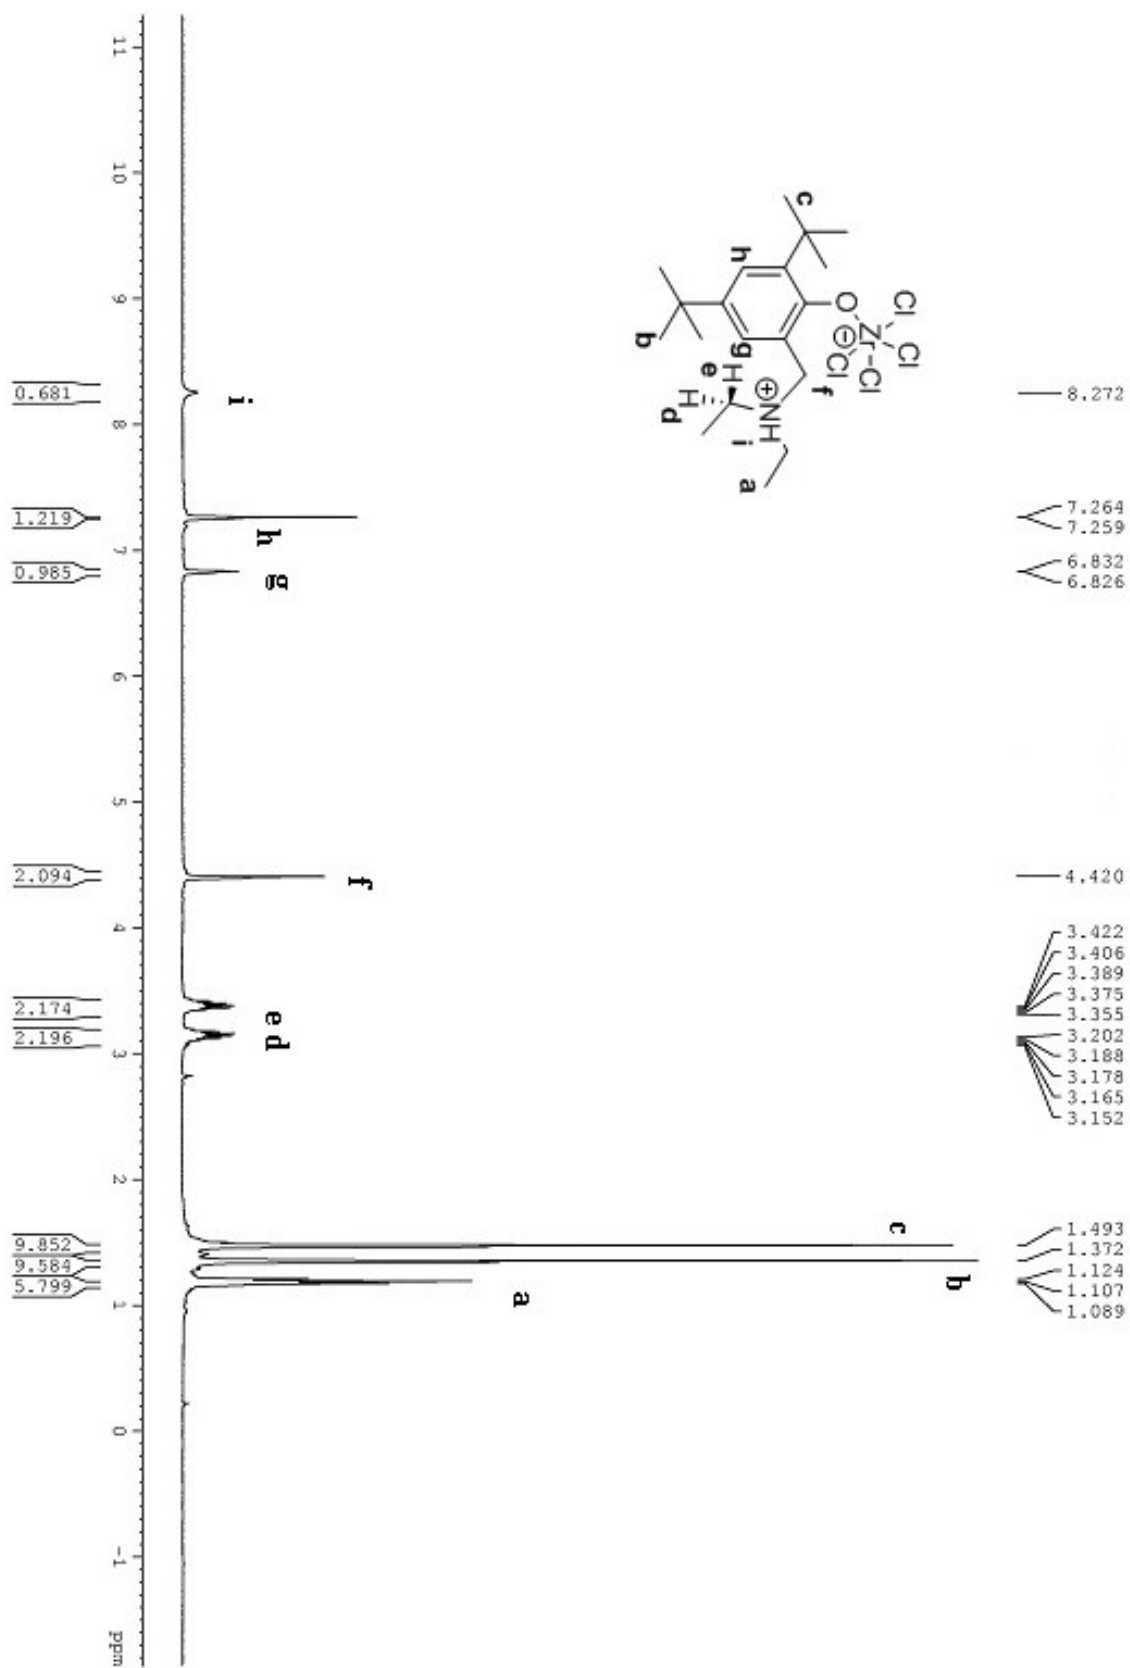

Figure S10. <sup>1</sup>H NMR (400 MHz, CDCl<sub>3</sub>) of Compound 4

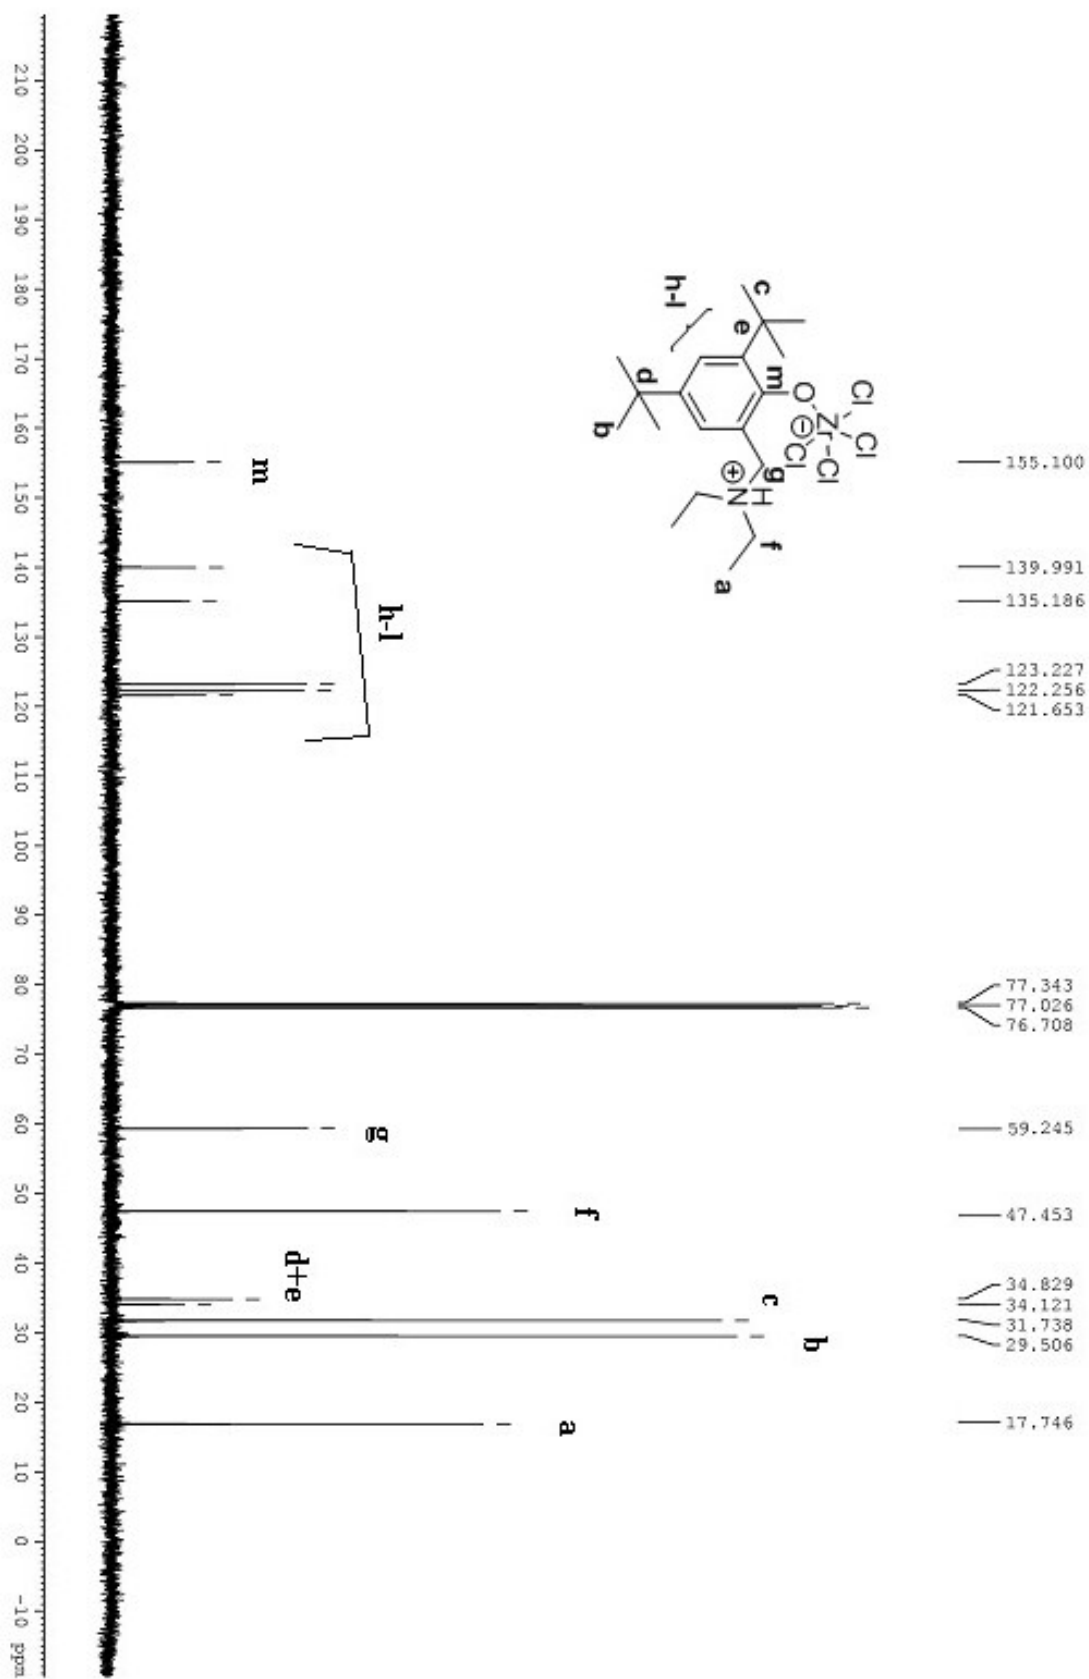

Figure S11. <sup>13</sup>C NMR (100 MHz, CDCl<sub>3</sub>) of Compound 4

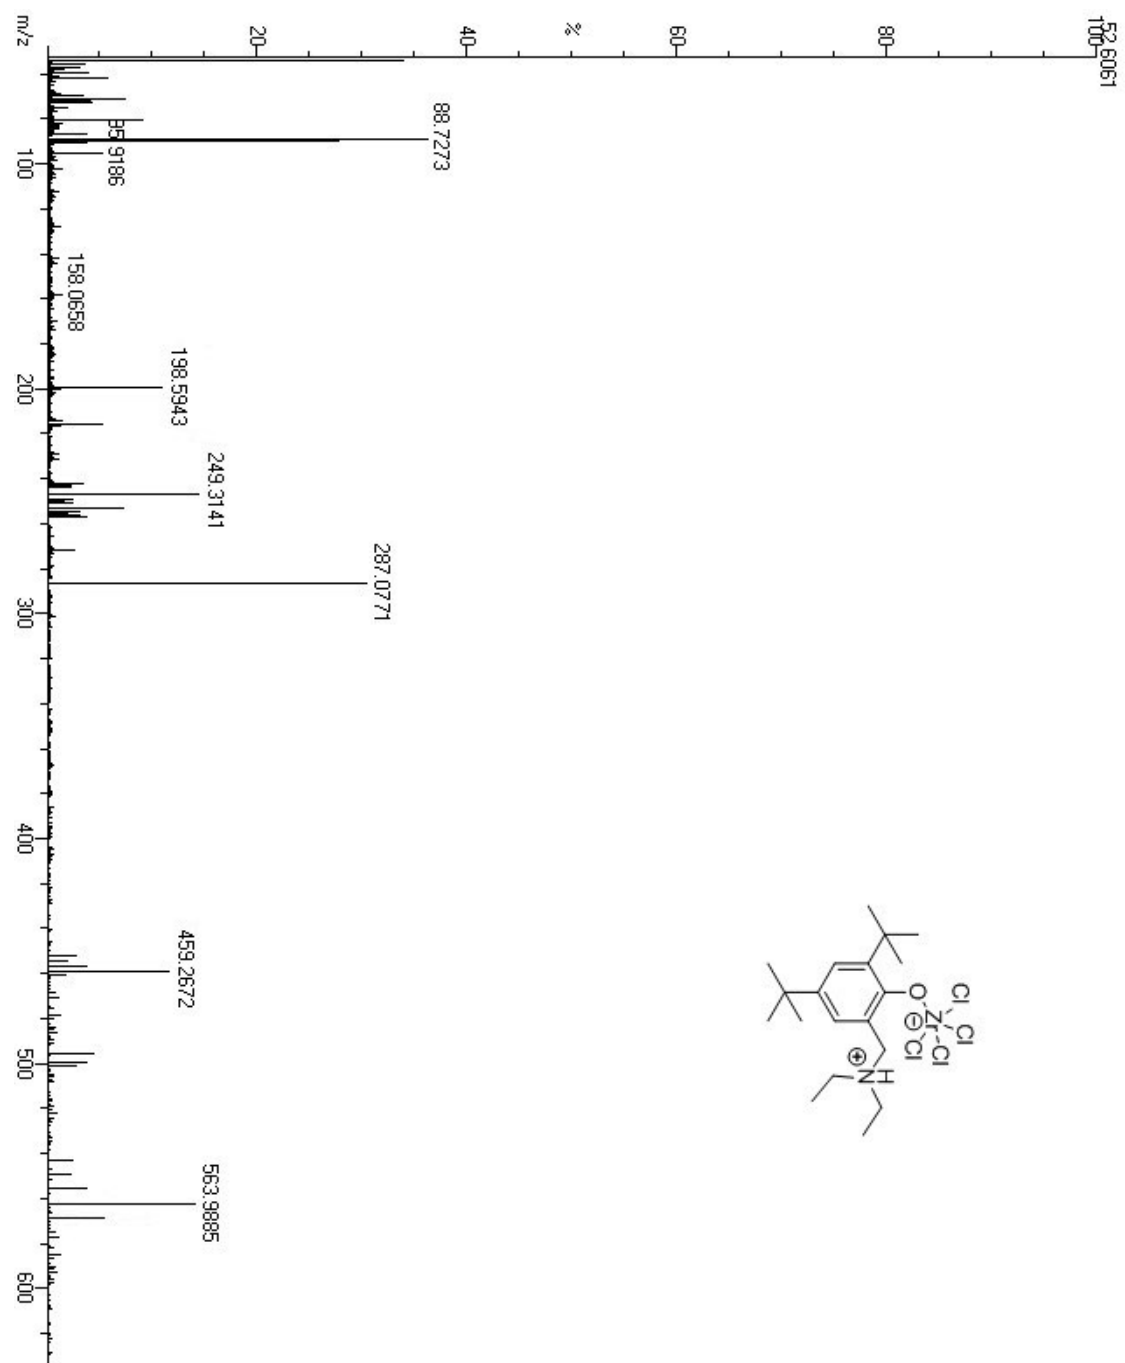

**Figure S12.** ESI mass spectrum of Compound 4

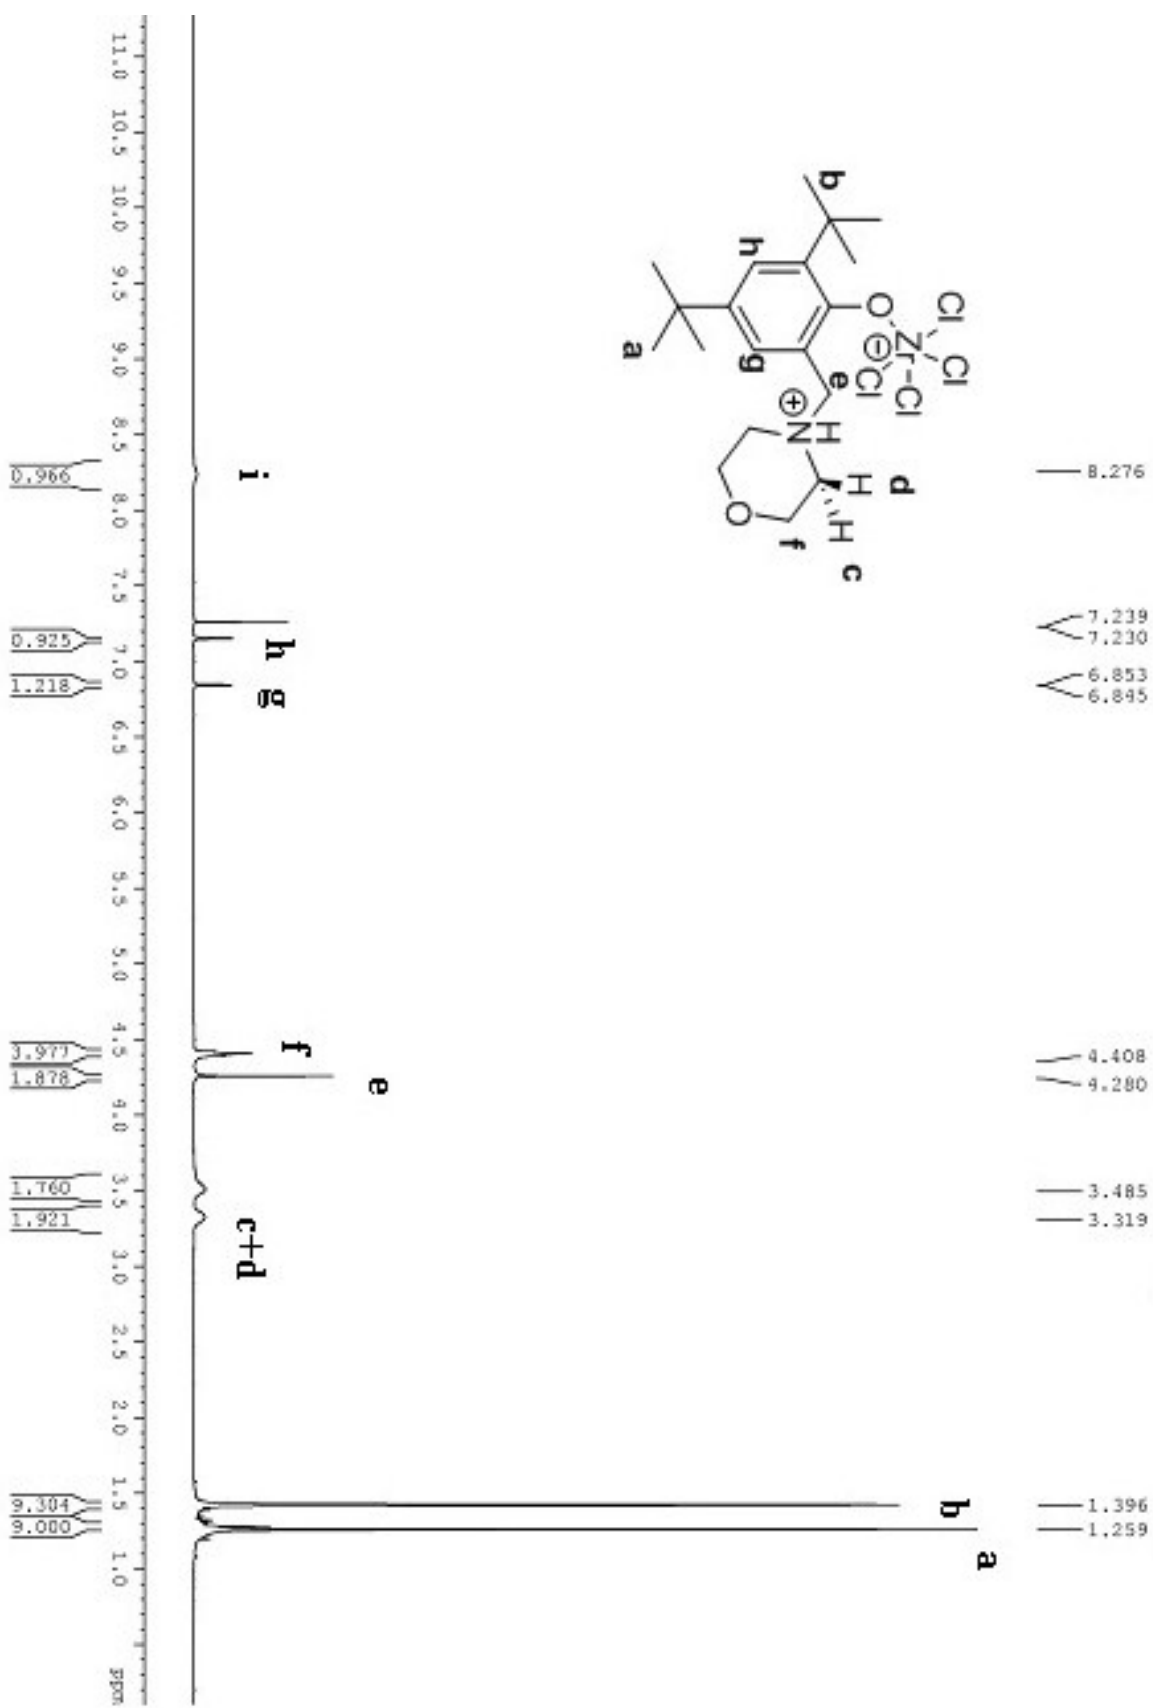

Figure S13.  $^1\text{H}$  NMR (400 MHz,  $\text{CDCl}_3$ ) of Compound 5



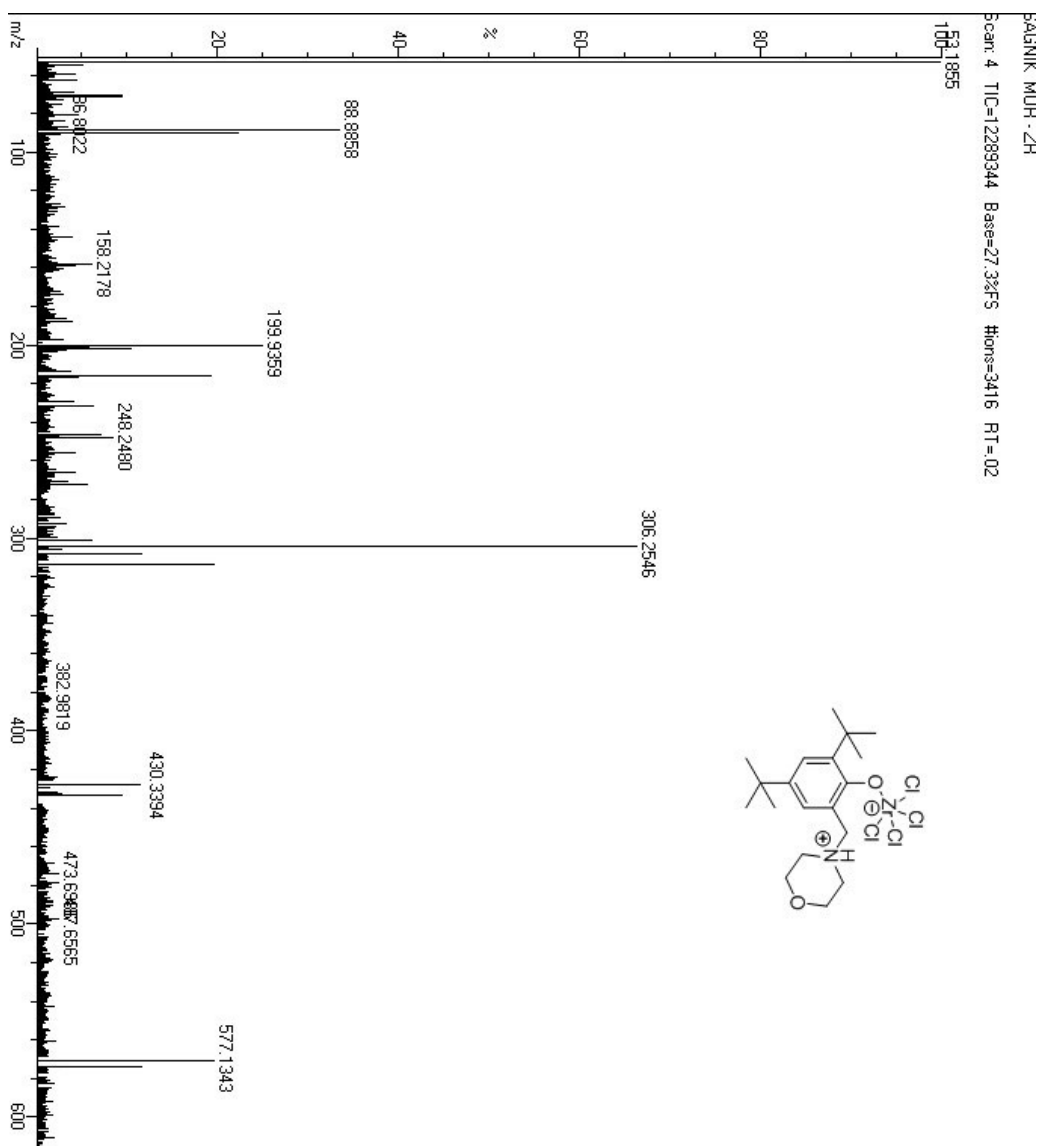

**Figure S15.** ESI mass spectrum of Compound 5



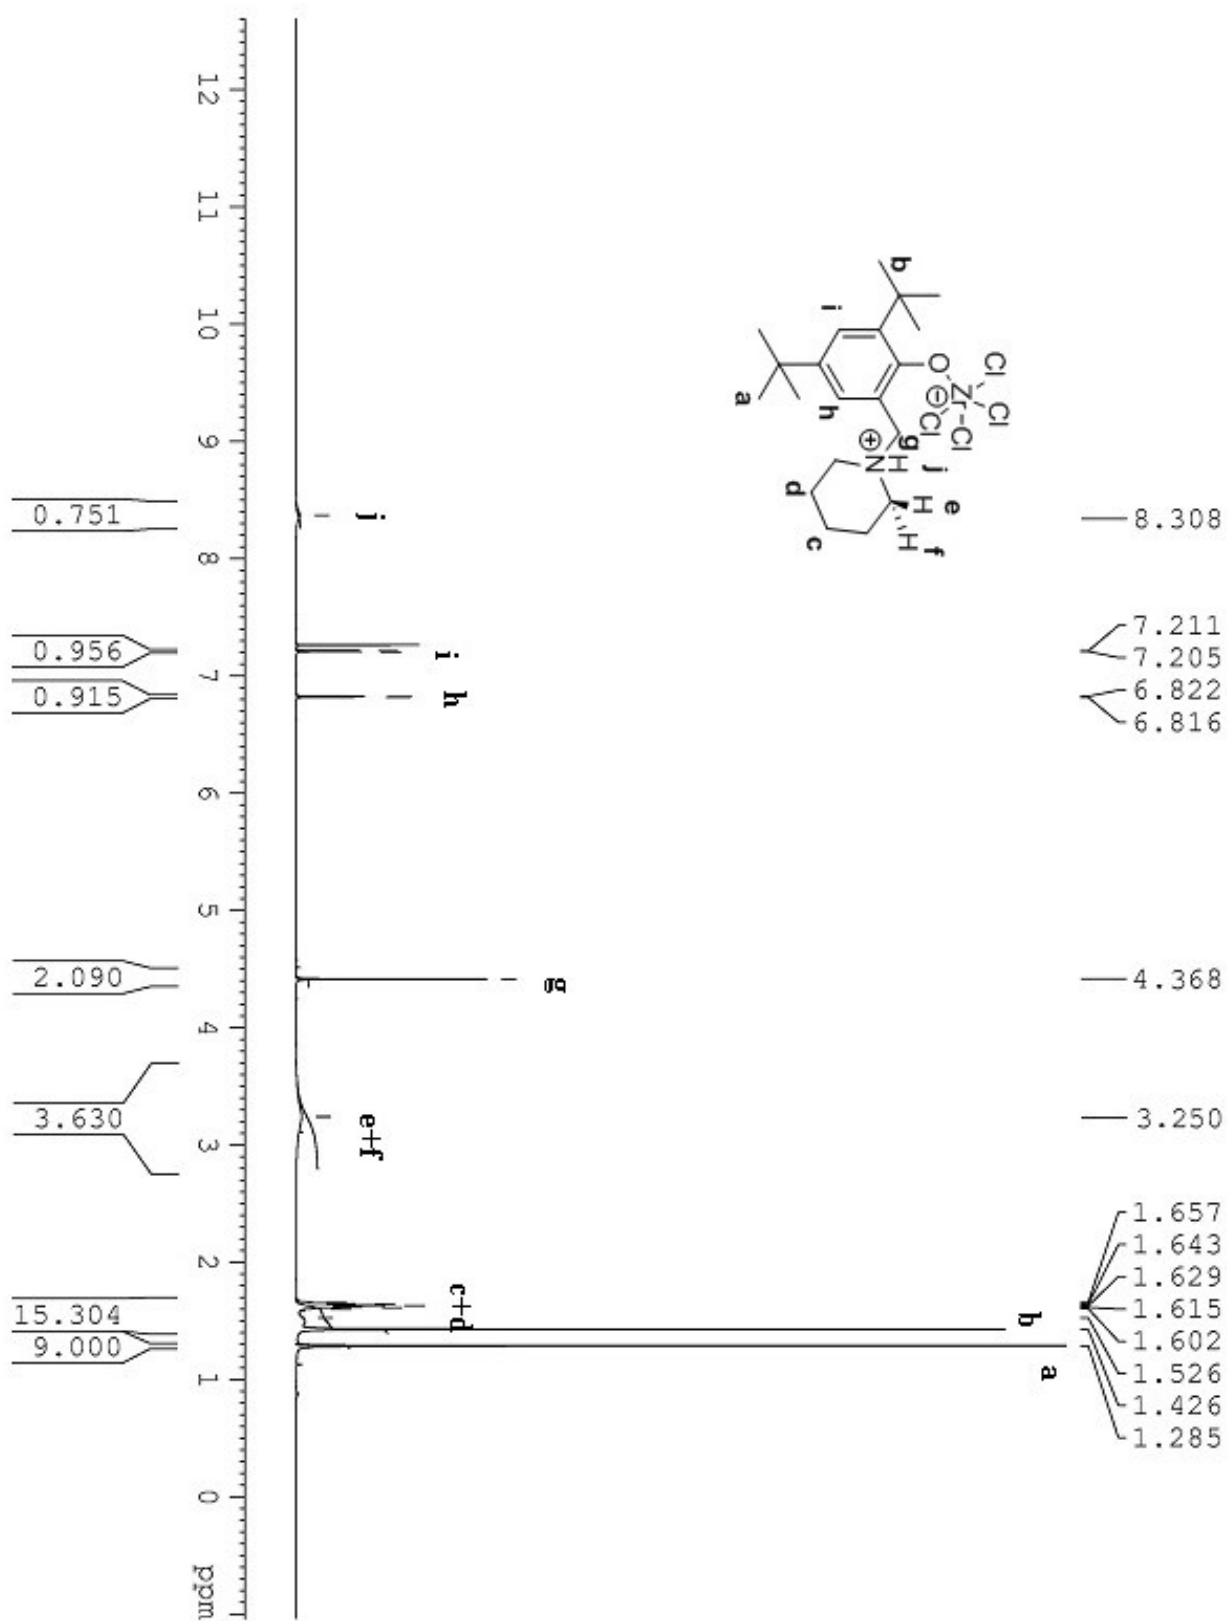

Figure S16.  $^1\text{H}$  NMR (400 MHz,  $\text{CDCl}_3$ ) of Compound 6

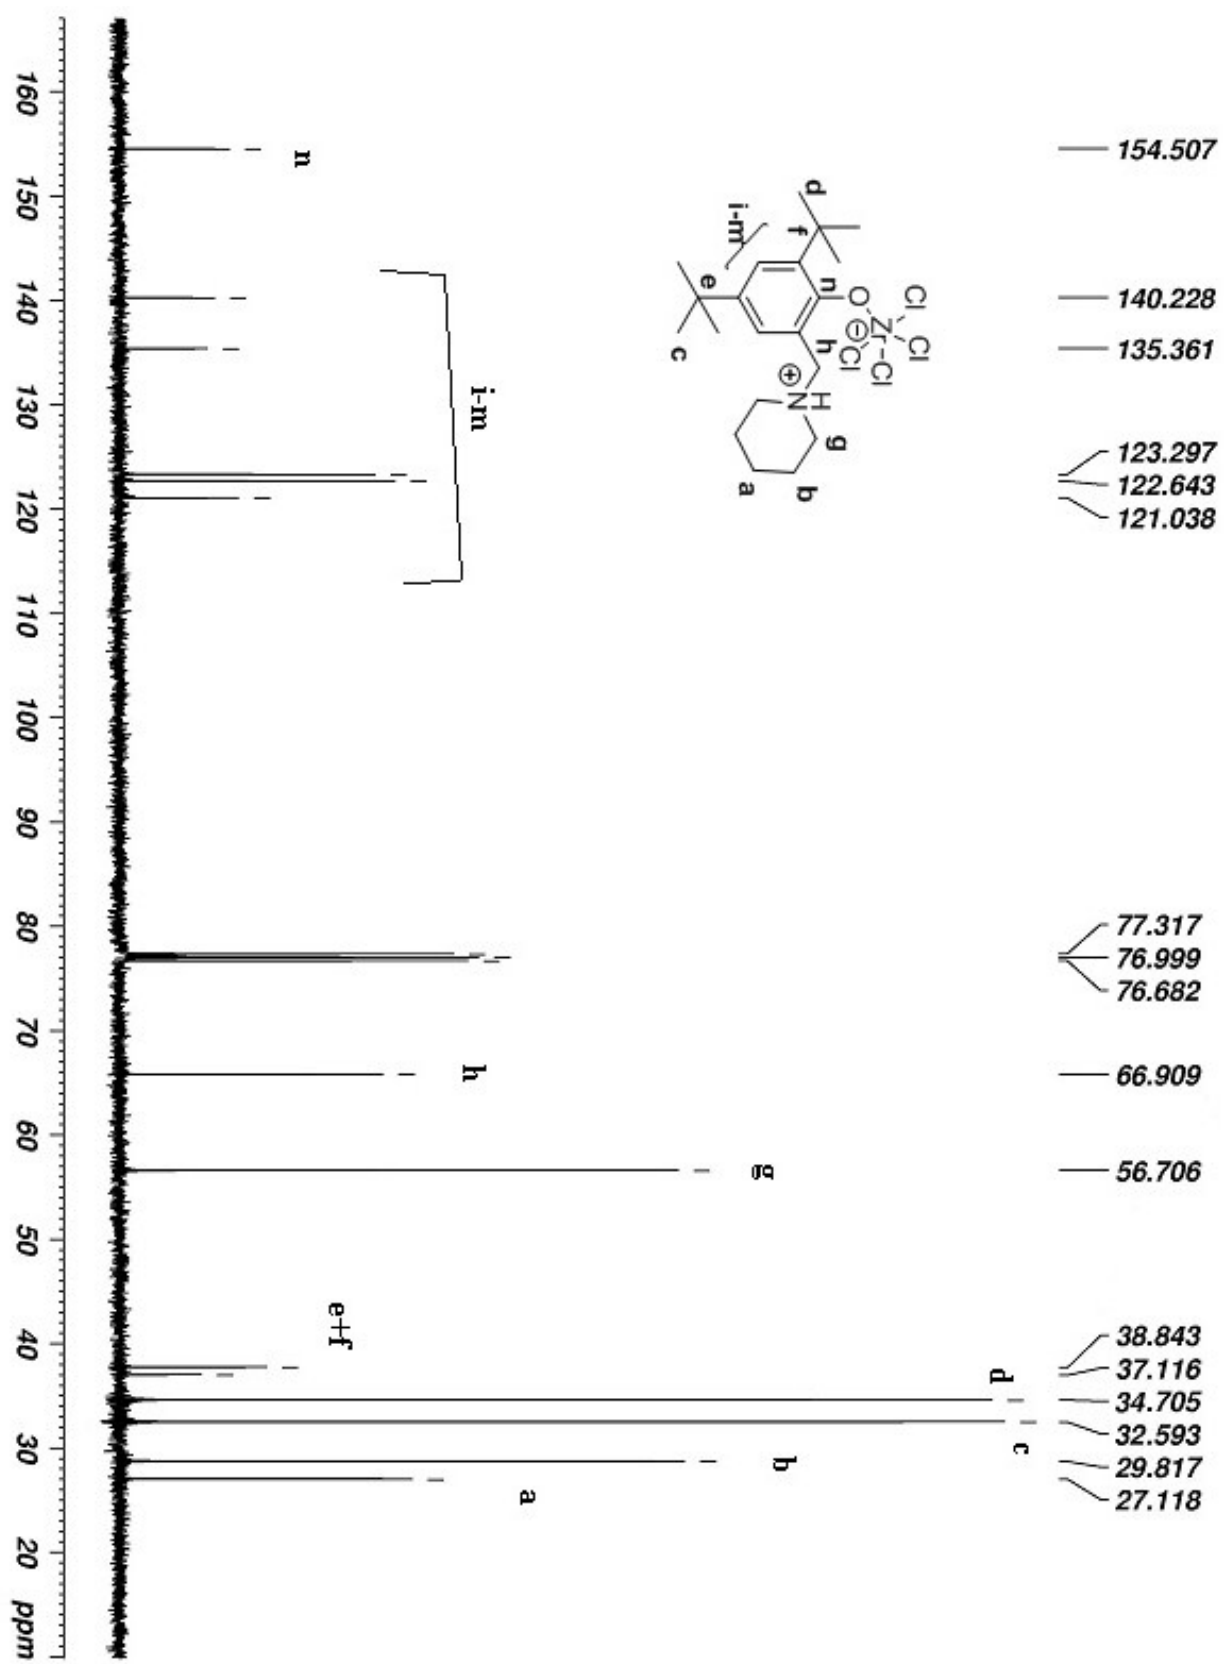

**Figure S17.**  $^{13}\text{C}$  NMR (100 MHz,  $\text{CDCl}_3$ ) of Compound 6

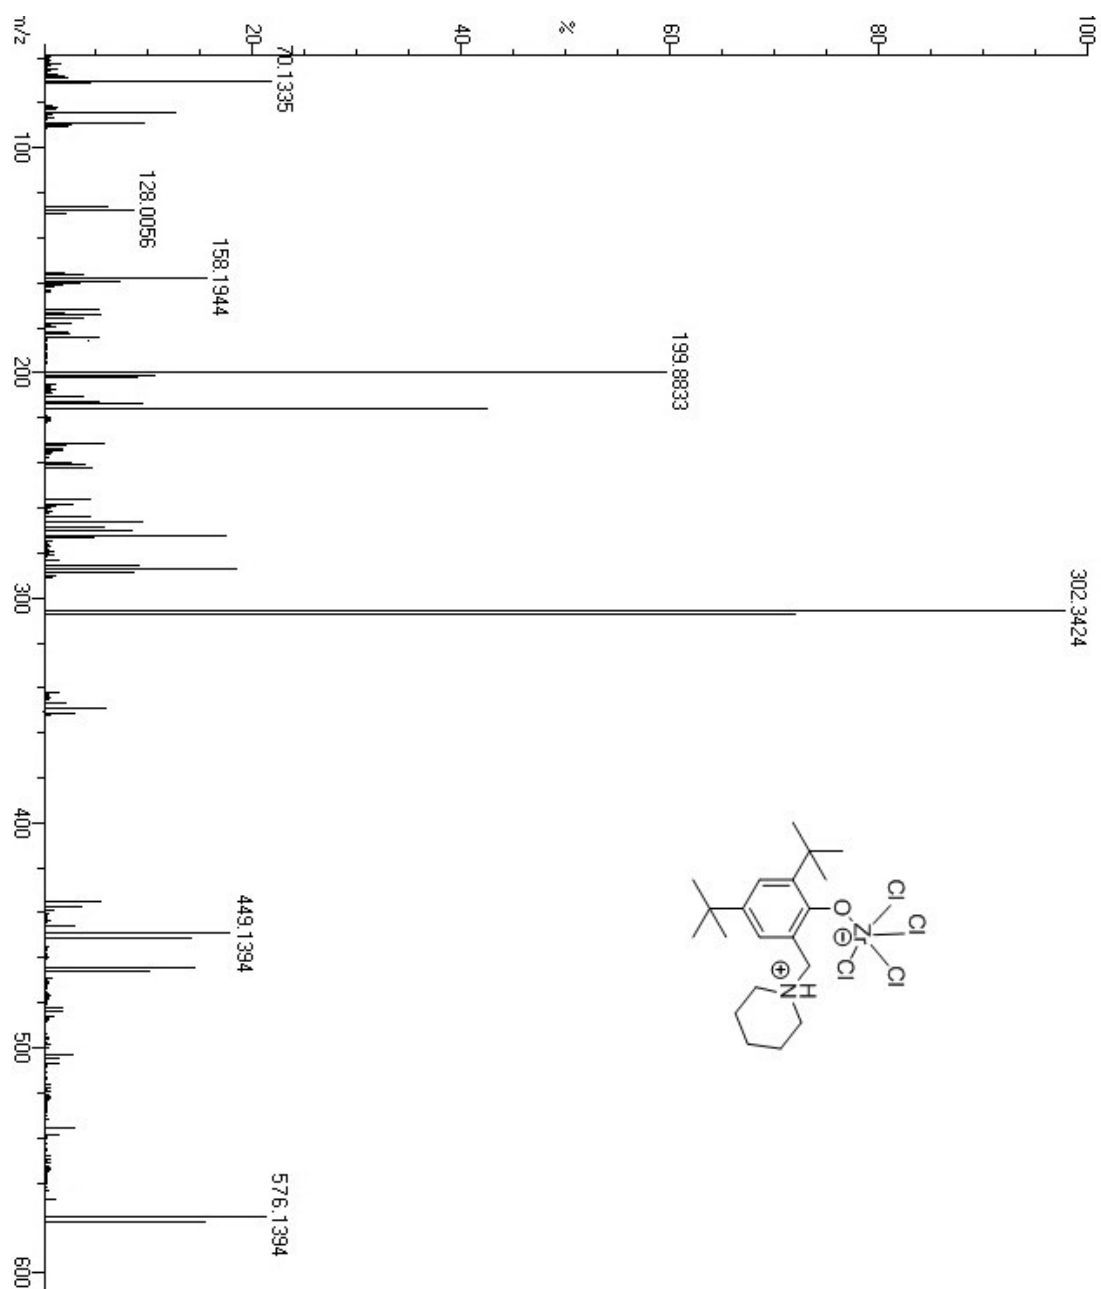

**Figure S18.** ESI mass spectrum of Compound 6

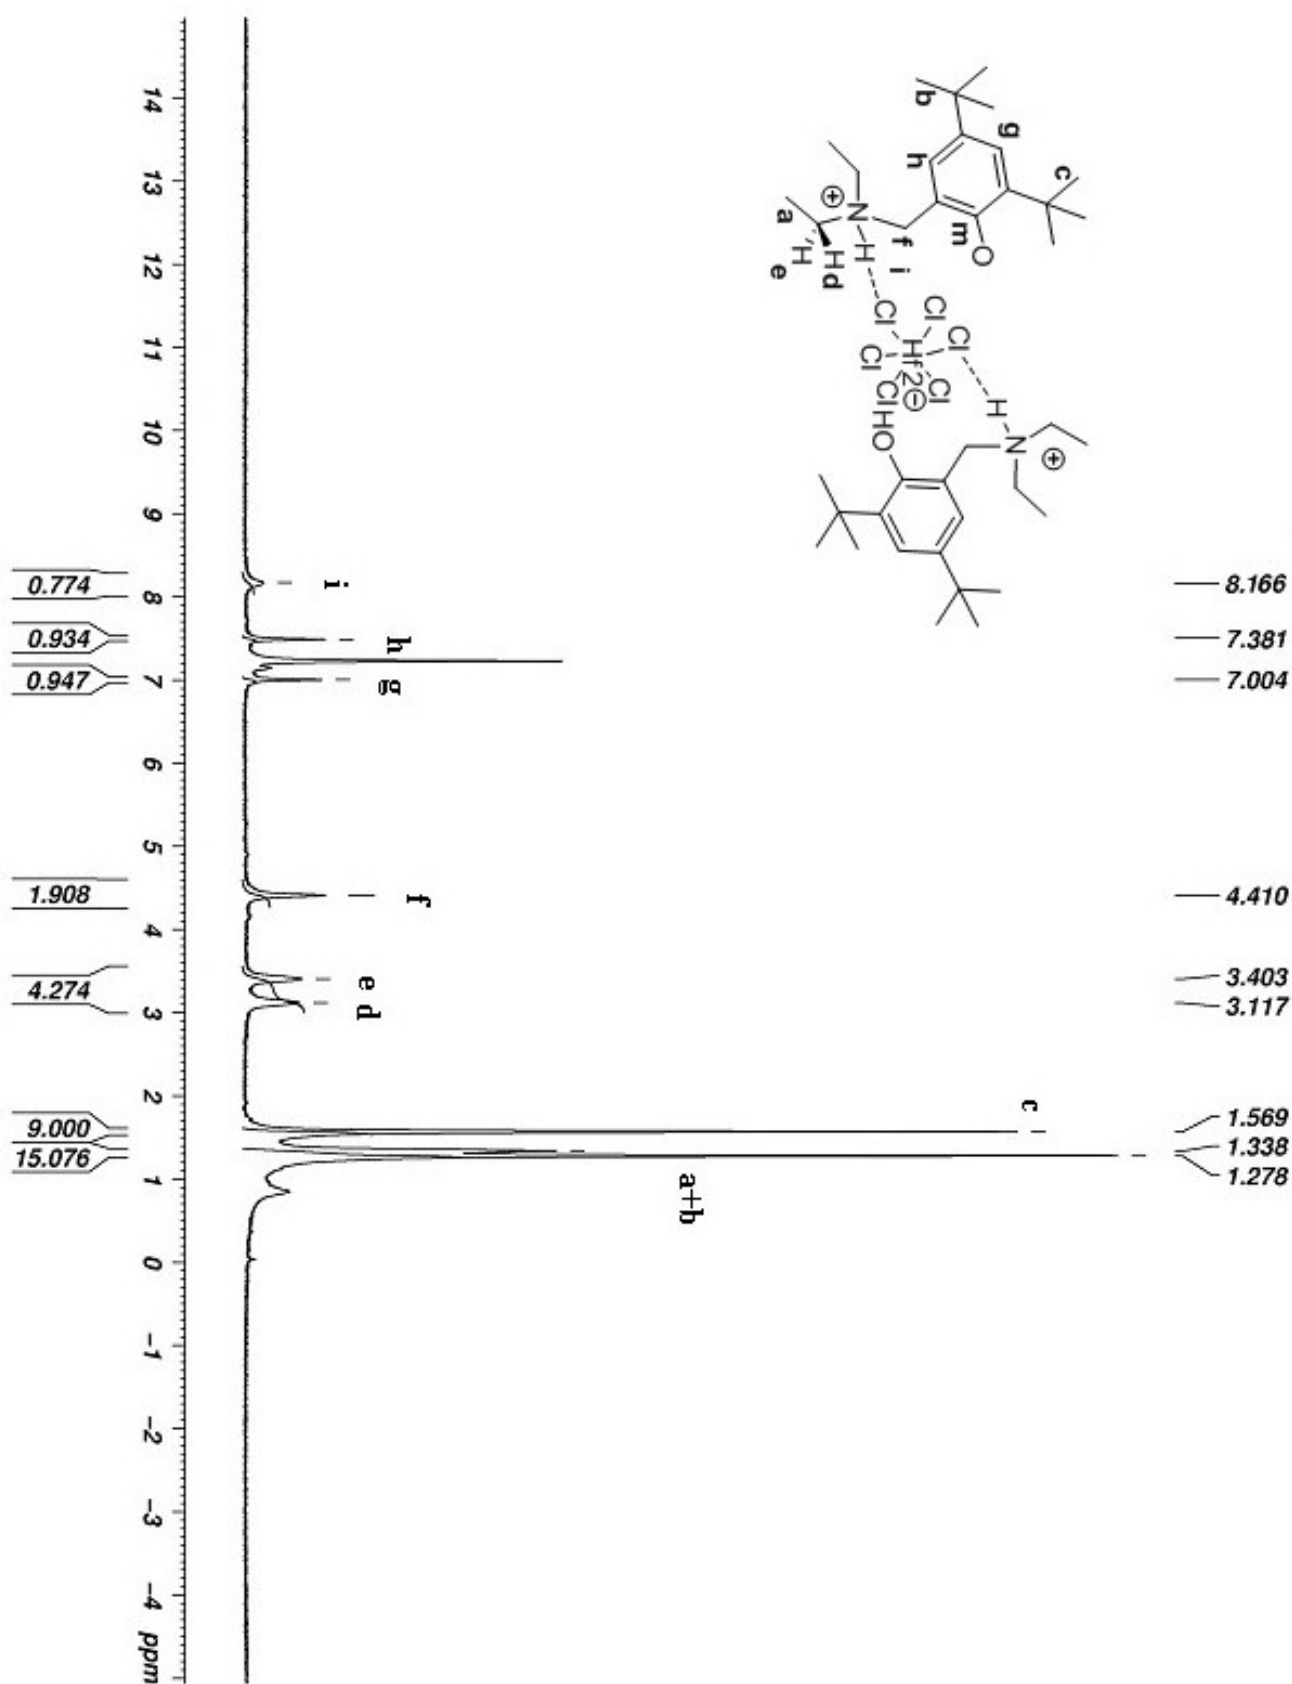

Figure S19. <sup>1</sup>H NMR (400 MHz, CDCl<sub>3</sub>) of Compound 7

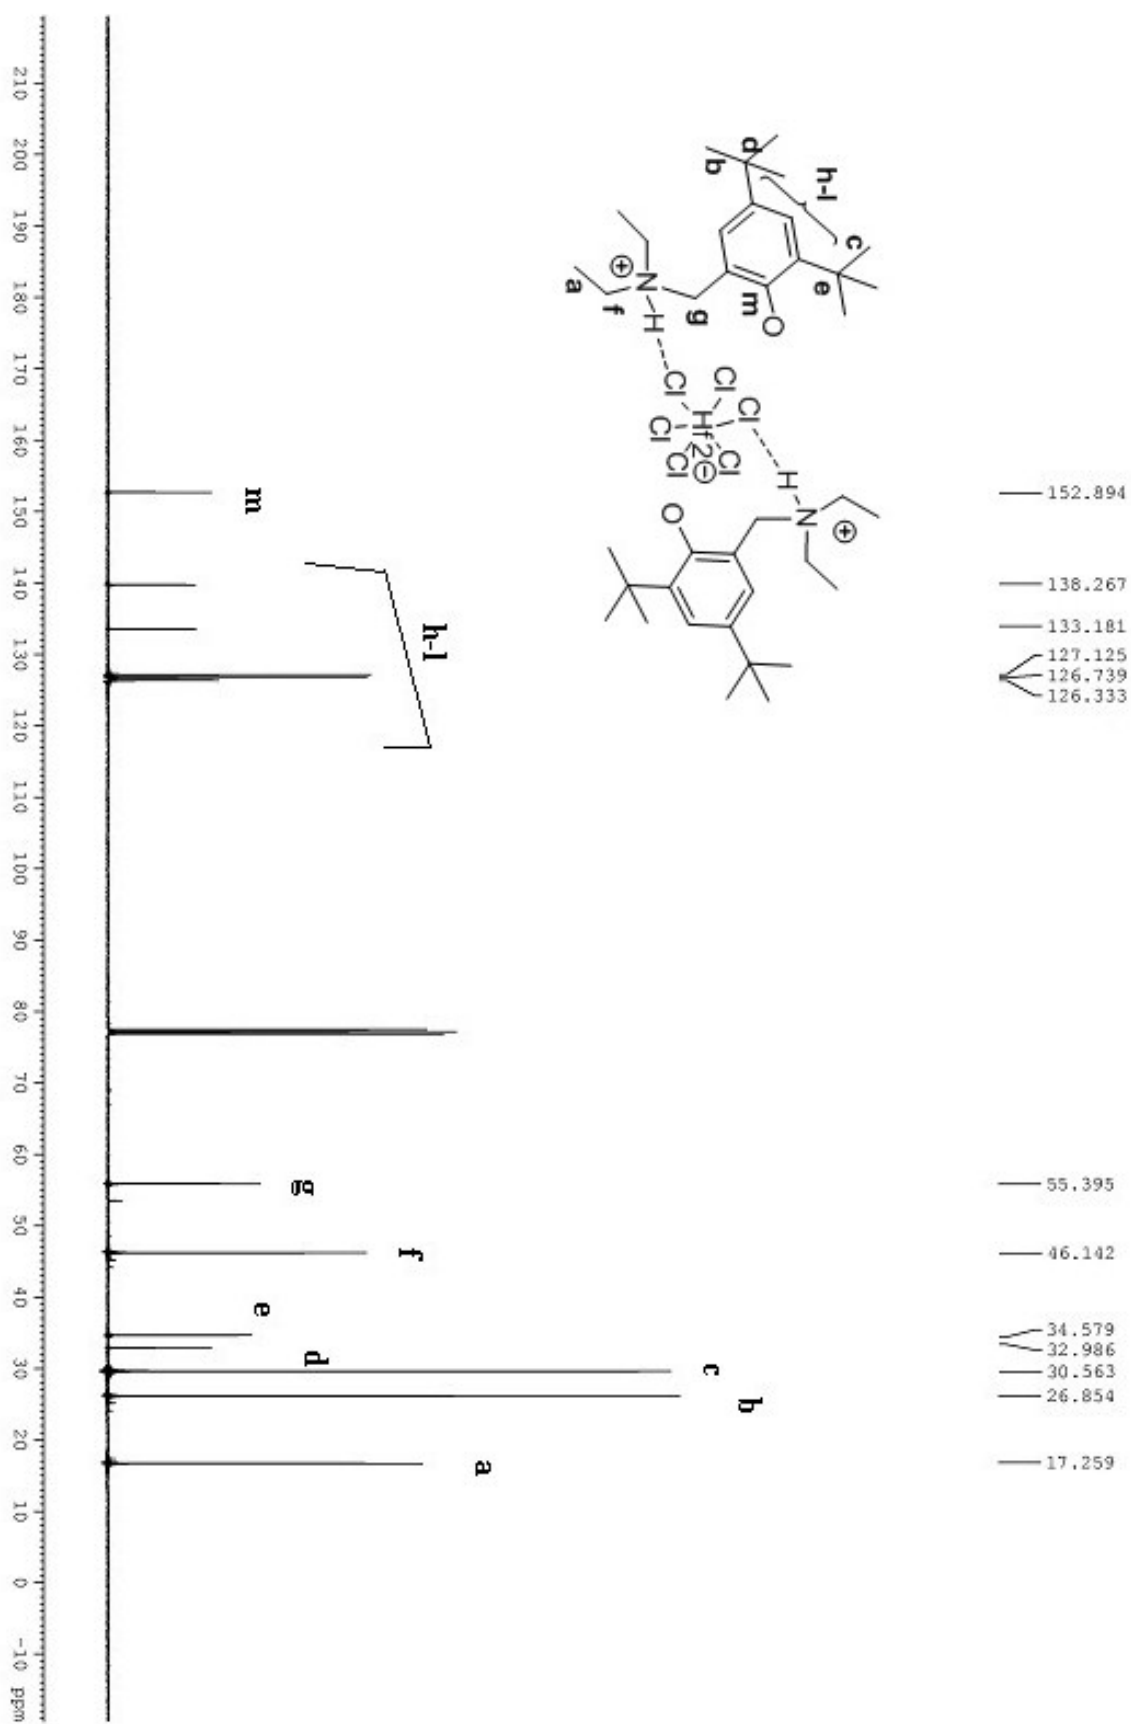

Figure S20. <sup>13</sup>C NMR (100 MHz, CDCl<sub>3</sub>) of Compound 7

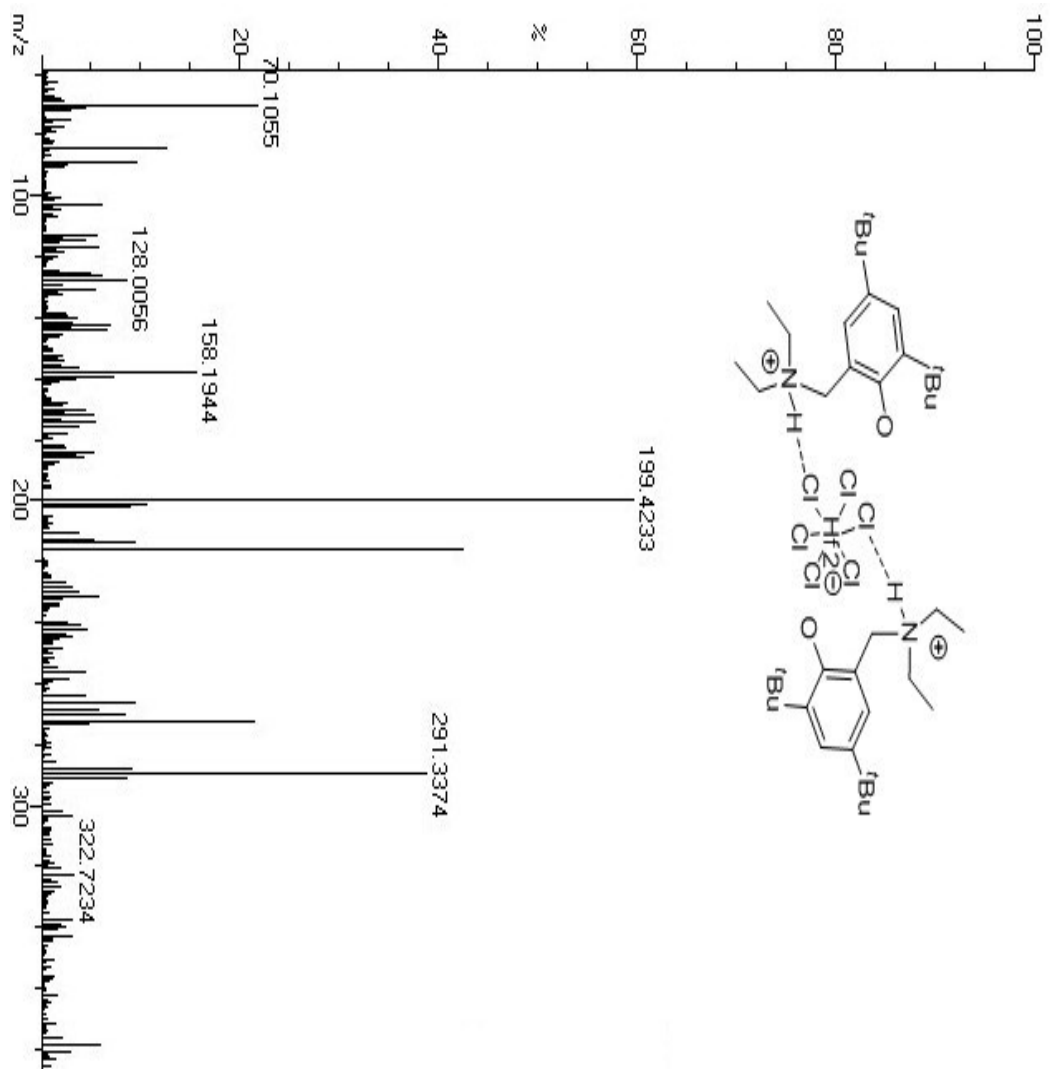

**Figure S21.** ESI mass spectrum of Compound 7

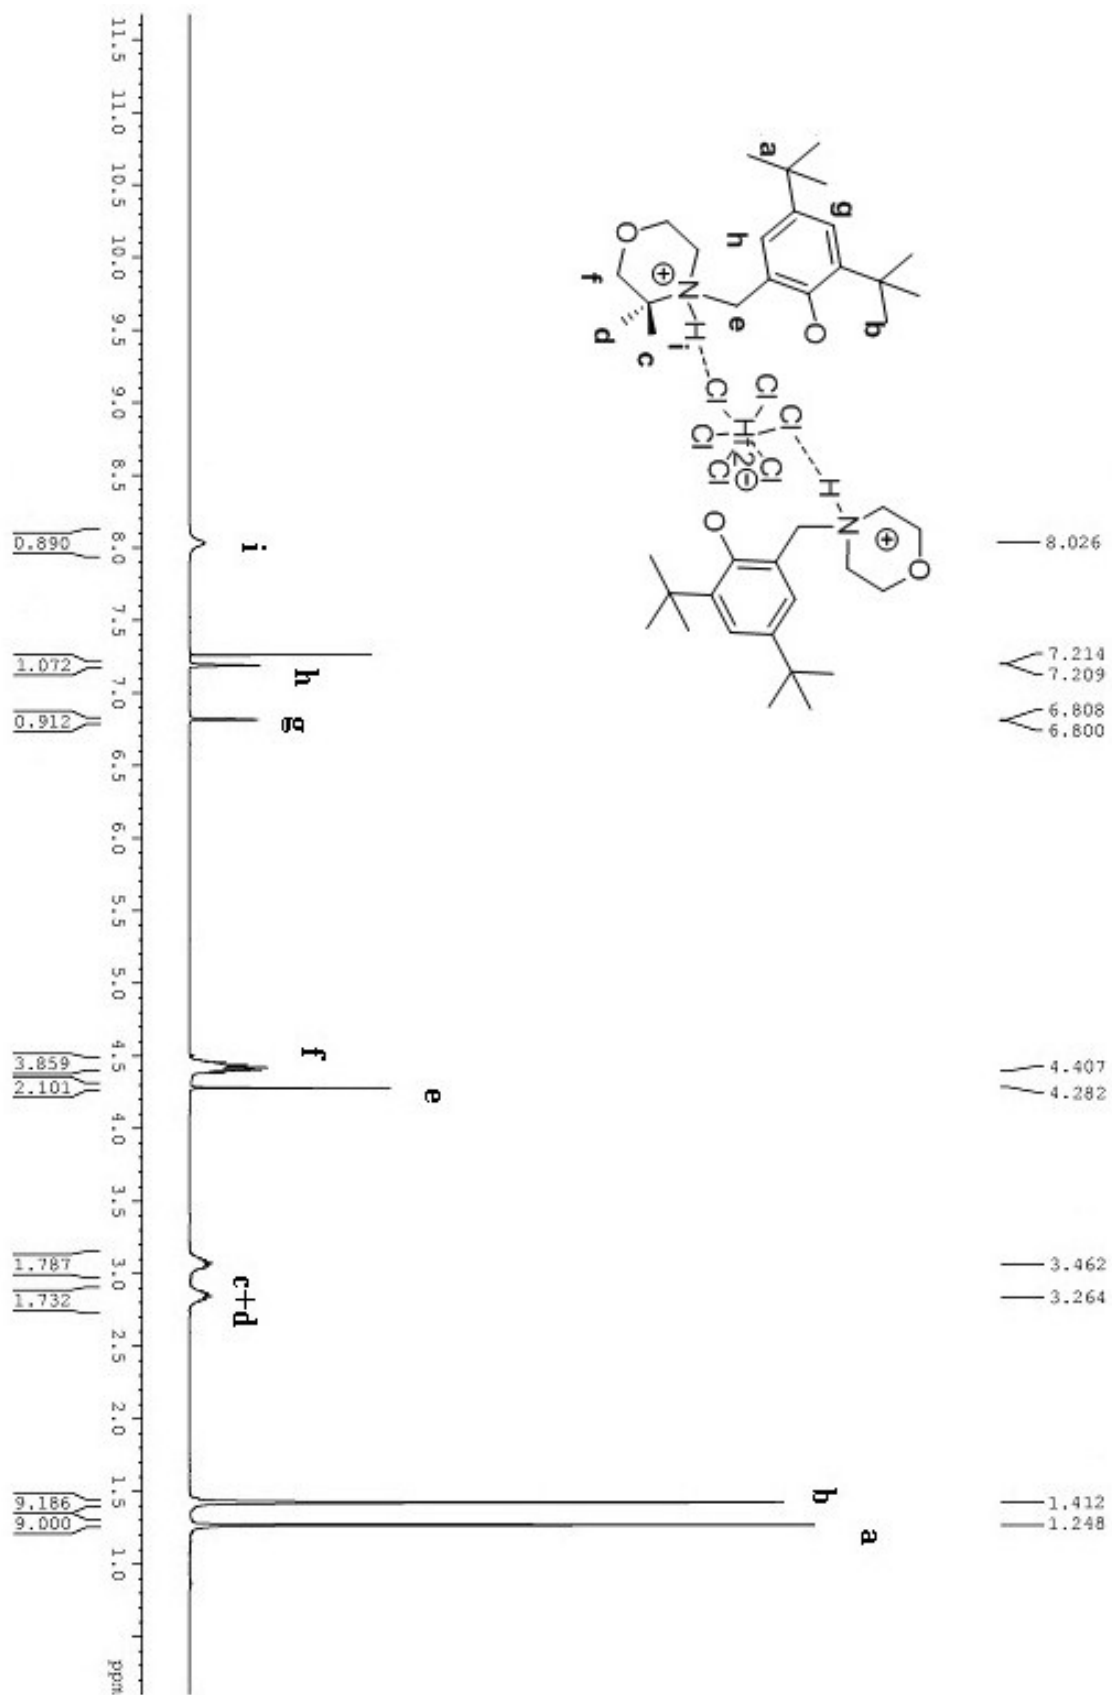

Figure S22. <sup>1</sup>H NMR (400 MHz, CDCl<sub>3</sub>) of Compound 8

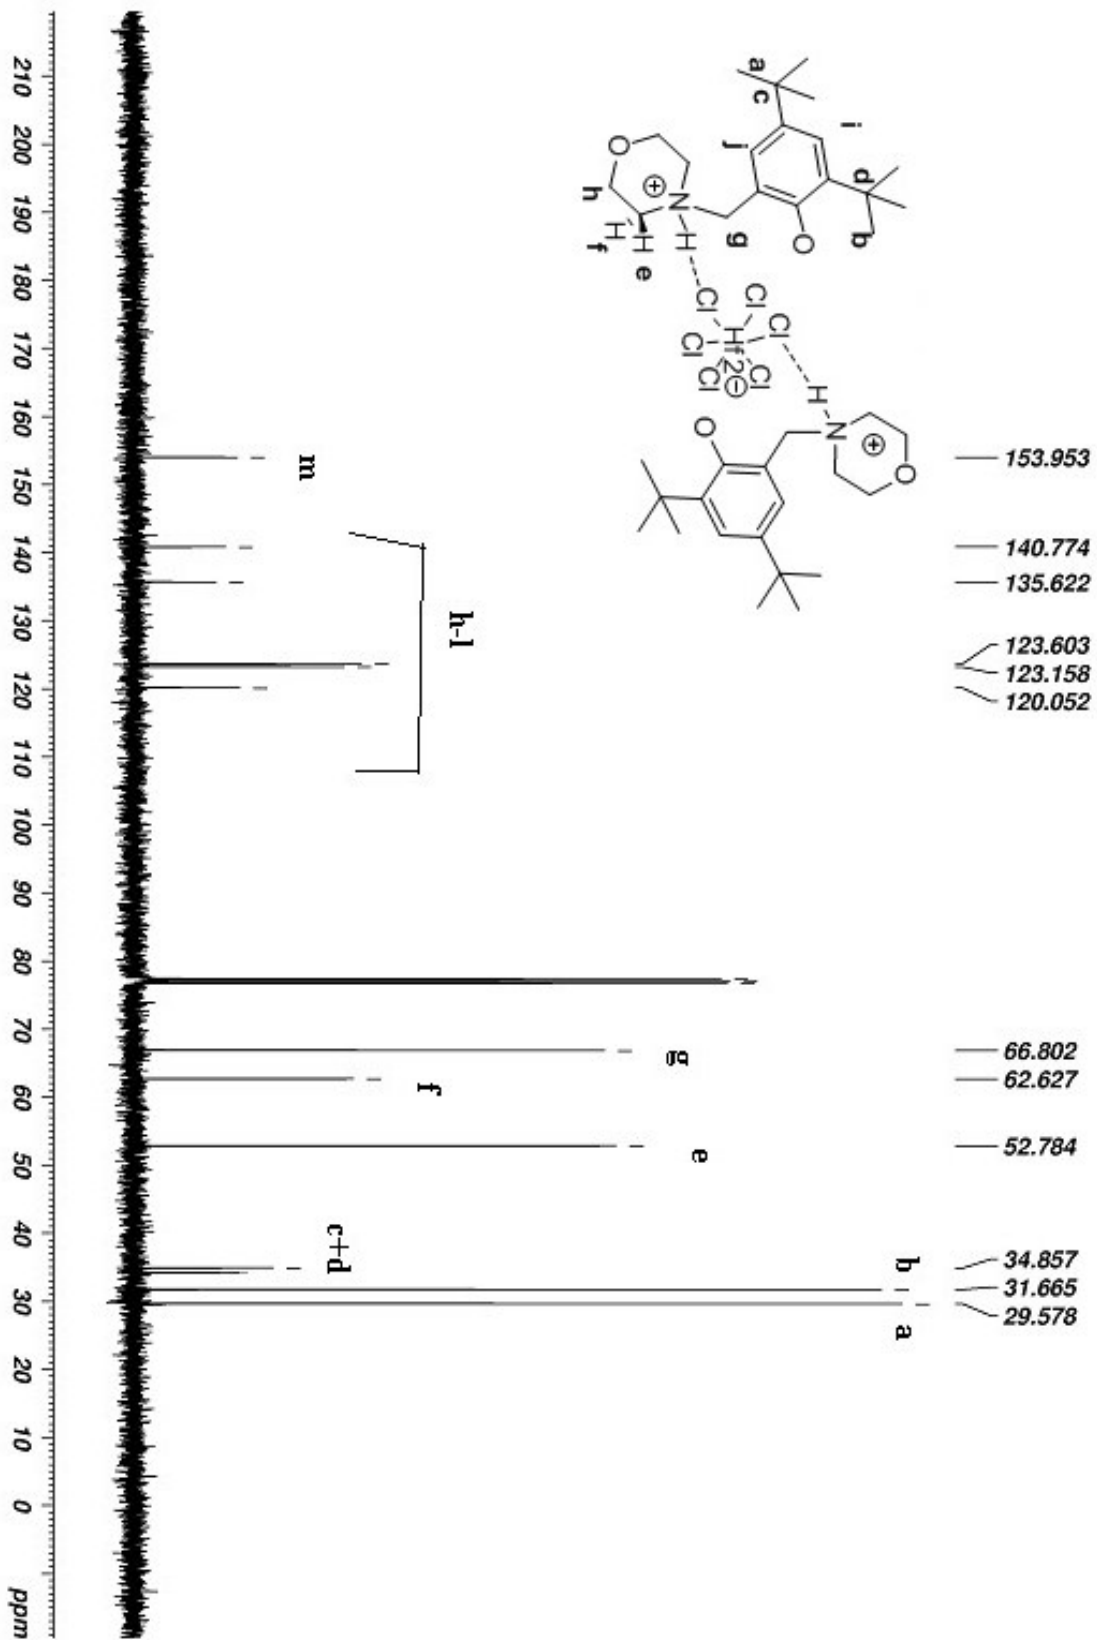

Figure S23. <sup>13</sup>C NMR (100 MHz, CDCl<sub>3</sub>) of Compound 8



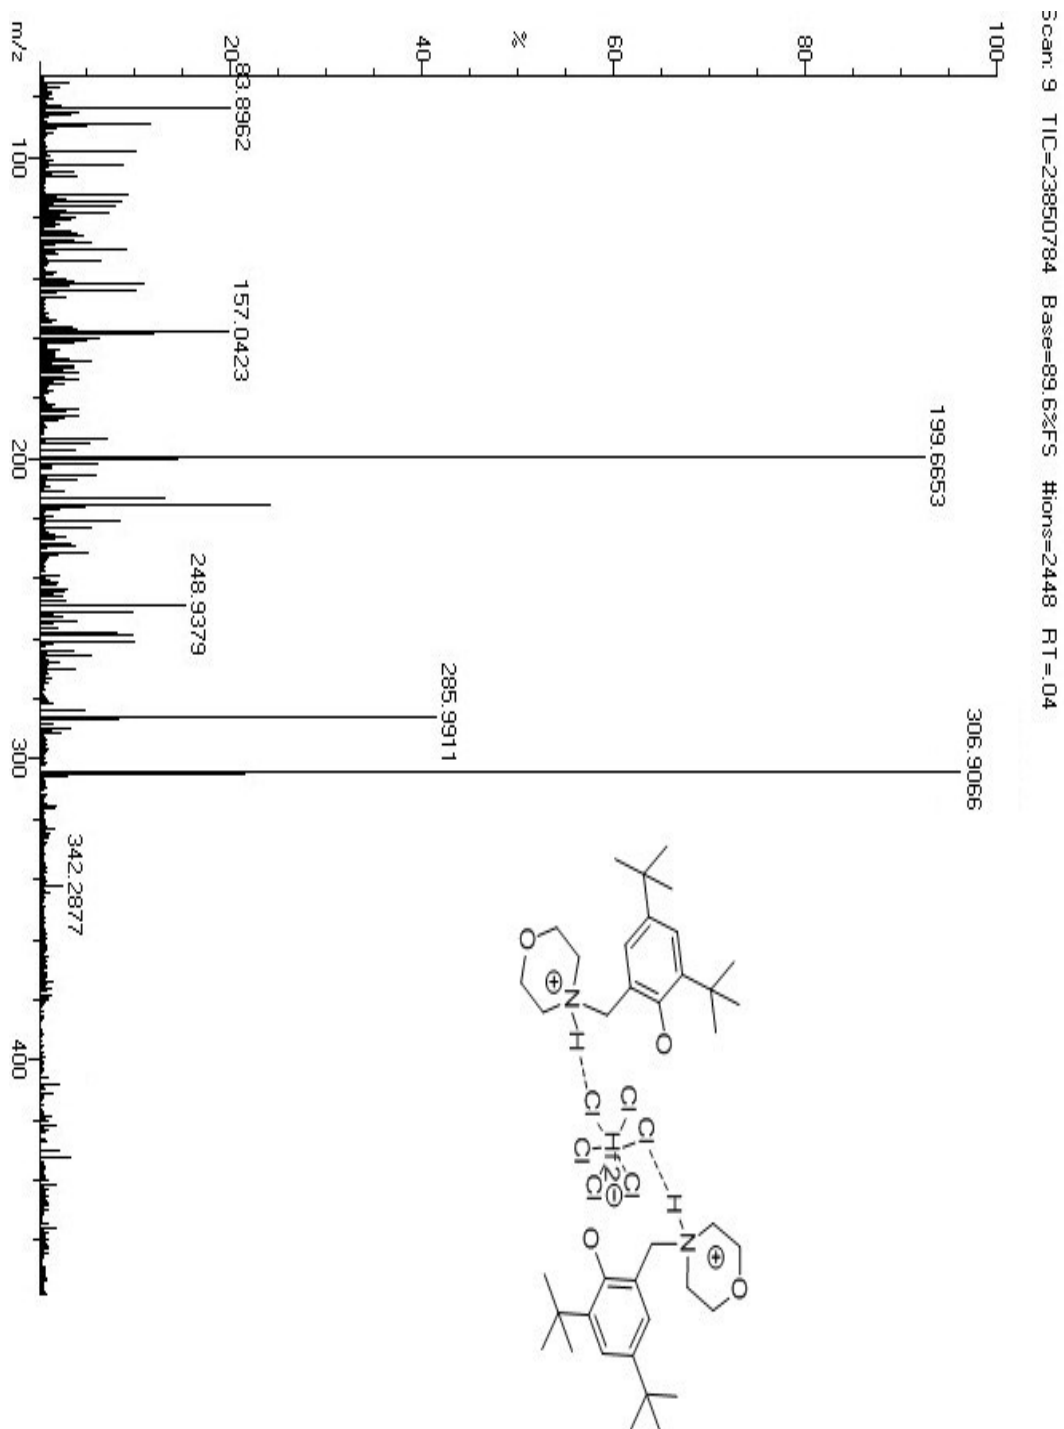

**Figure S24.** ESI mass spectrum of Compound 8

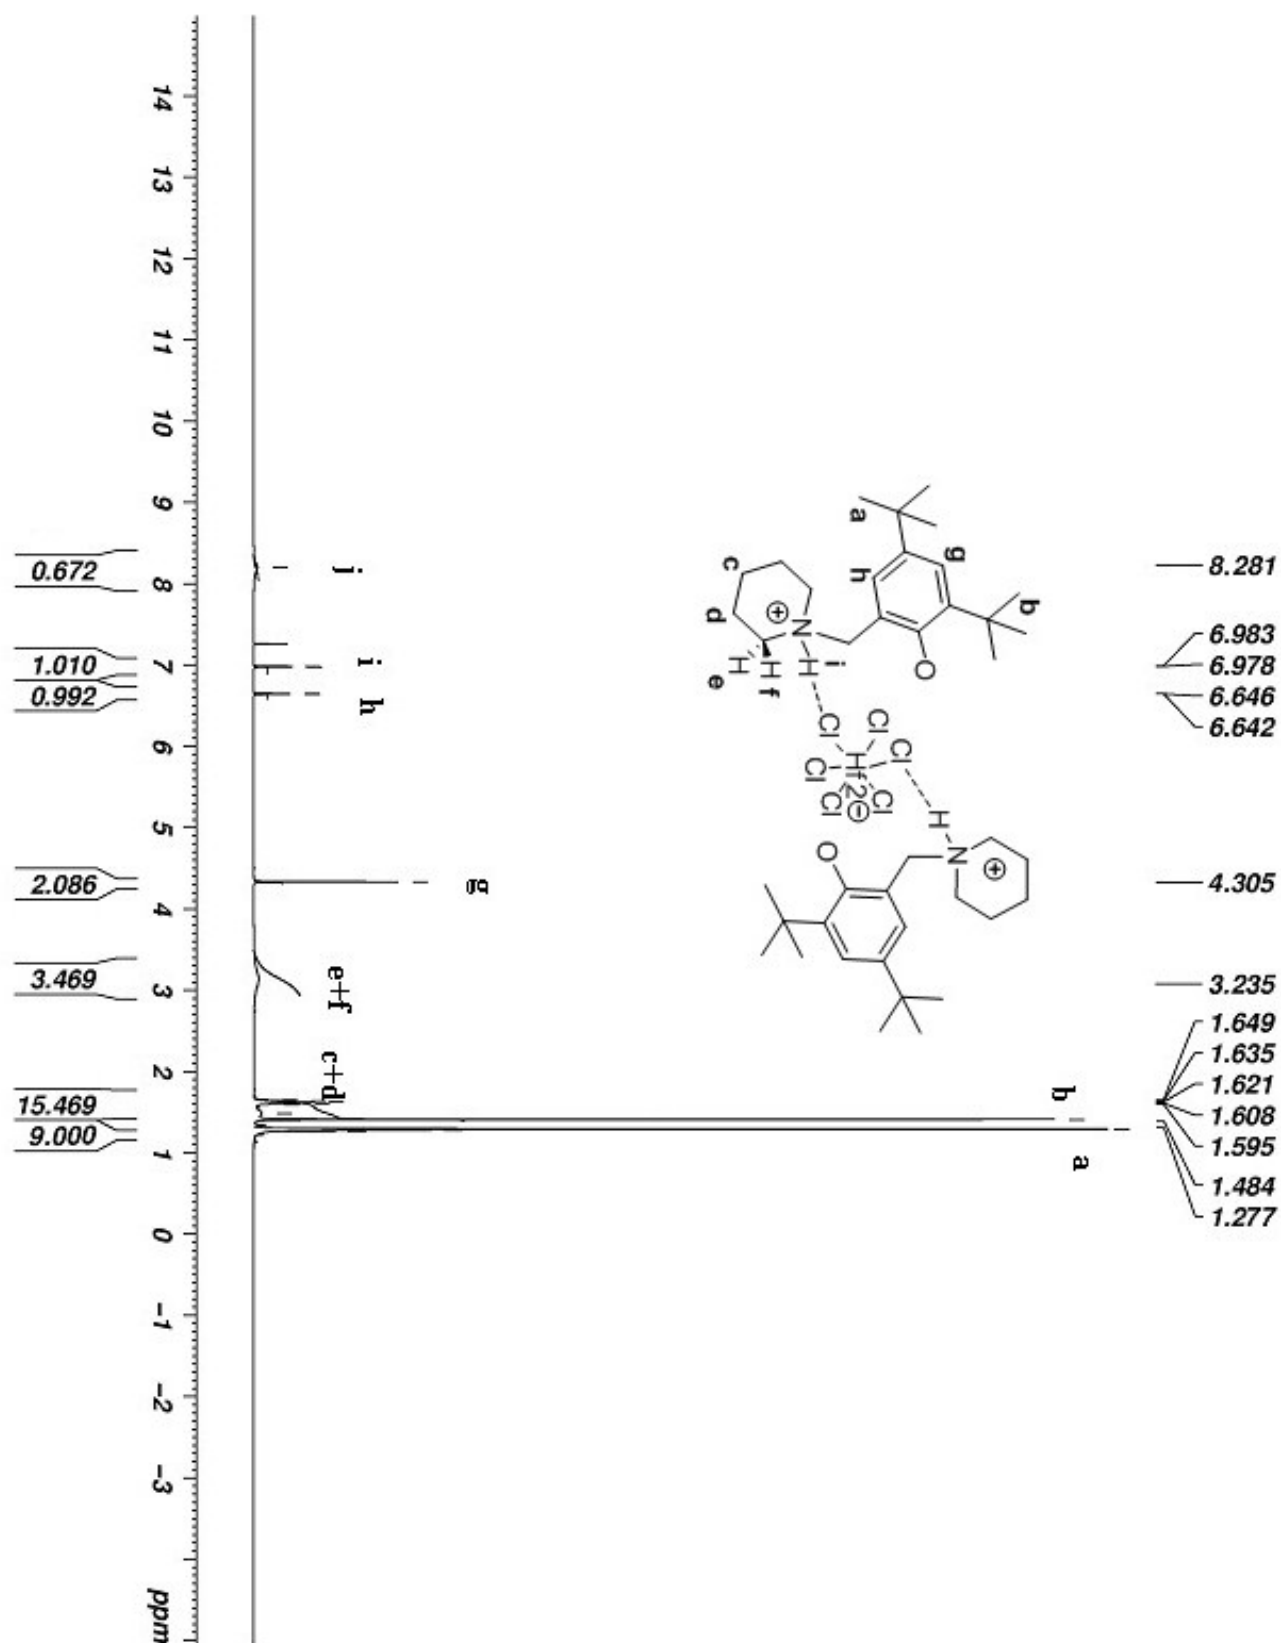

Figure S25. <sup>1</sup>H NMR (400 MHz, CDCl<sub>3</sub>) of Compound 9

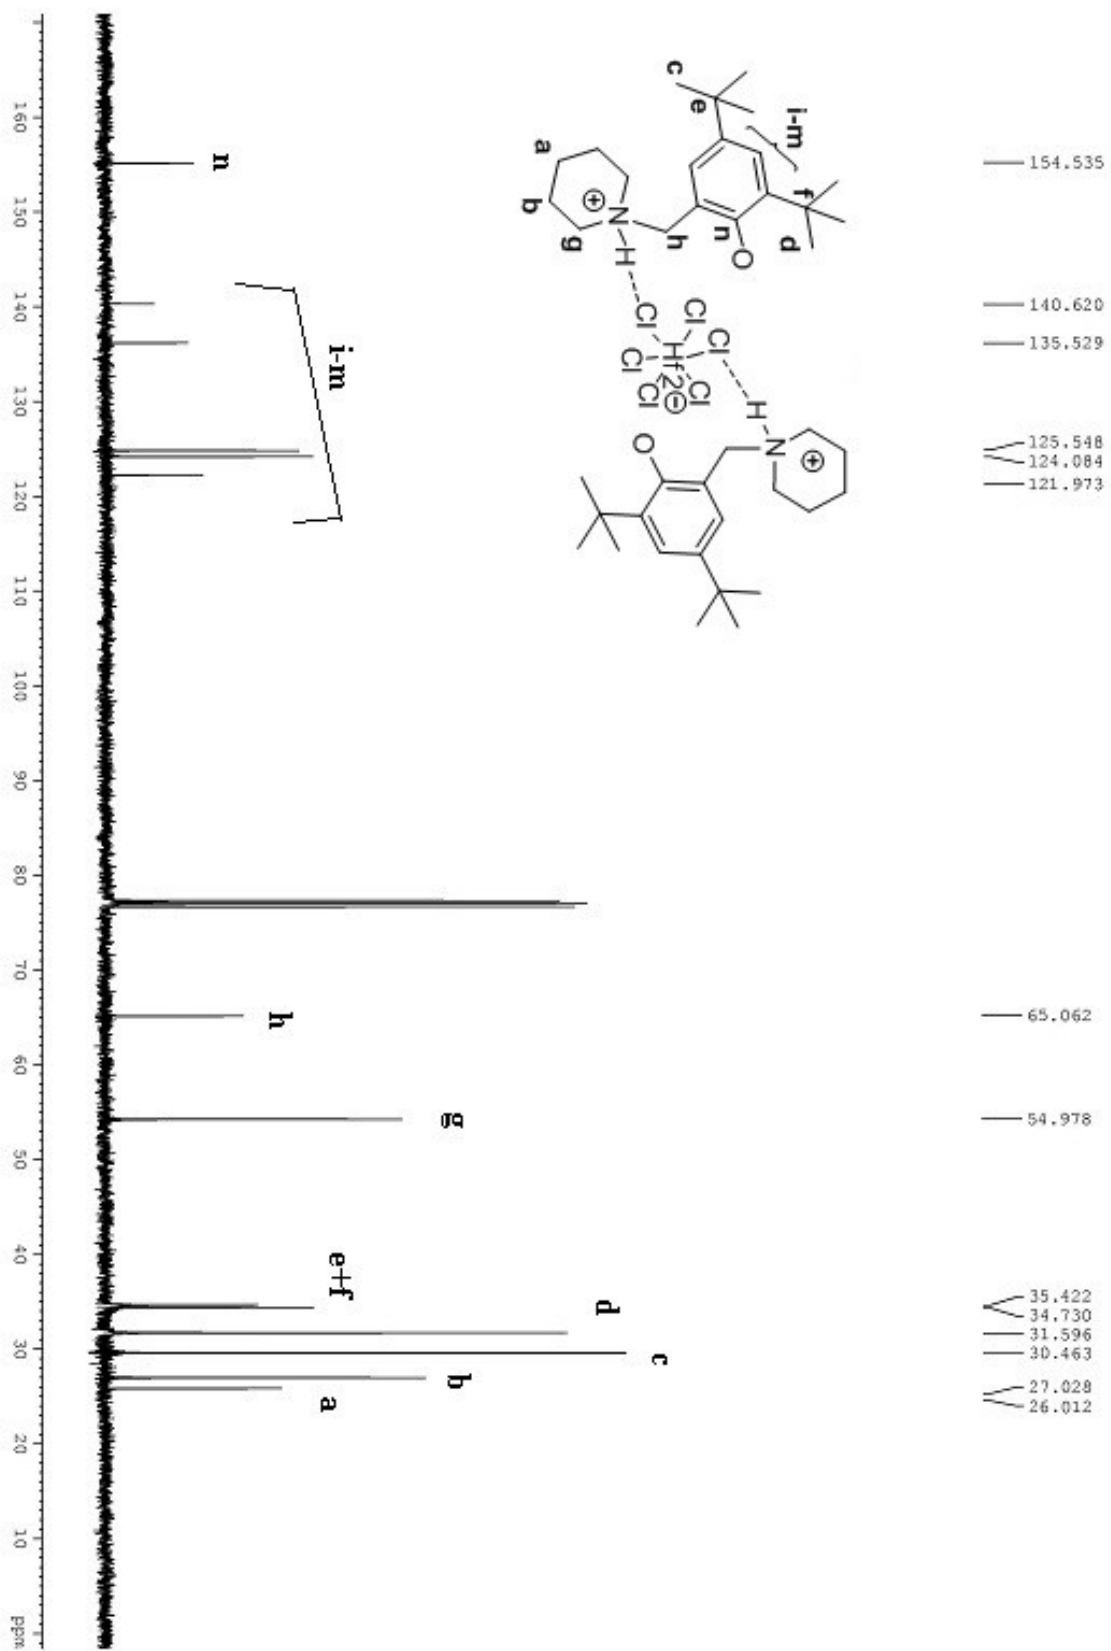

Figure S26. <sup>13</sup>C NMR (100 MHz, CDCl<sub>3</sub>) of Compound 9

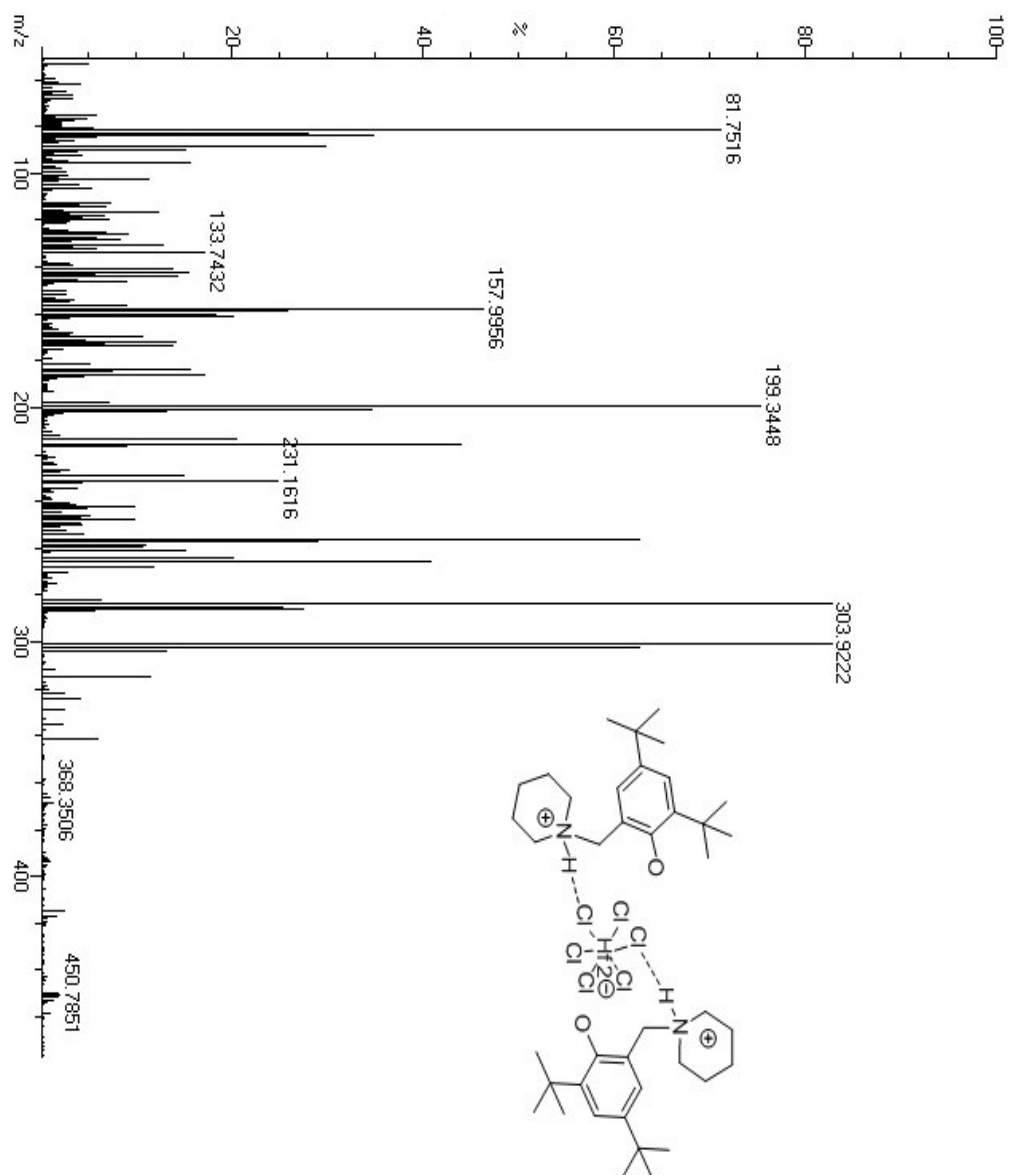

**Figure S27.** ESI mass spectrum of Compound 9

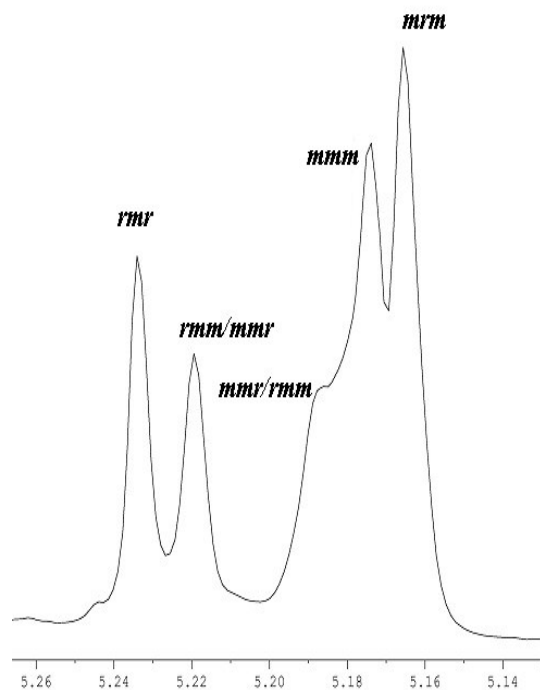

**Figure S28.** Homocoupled  $^1\text{H}$  NMR (500 MHz,  $\text{CDCl}_3$ ) spectrum of the methine region of PLA obtained using **1**

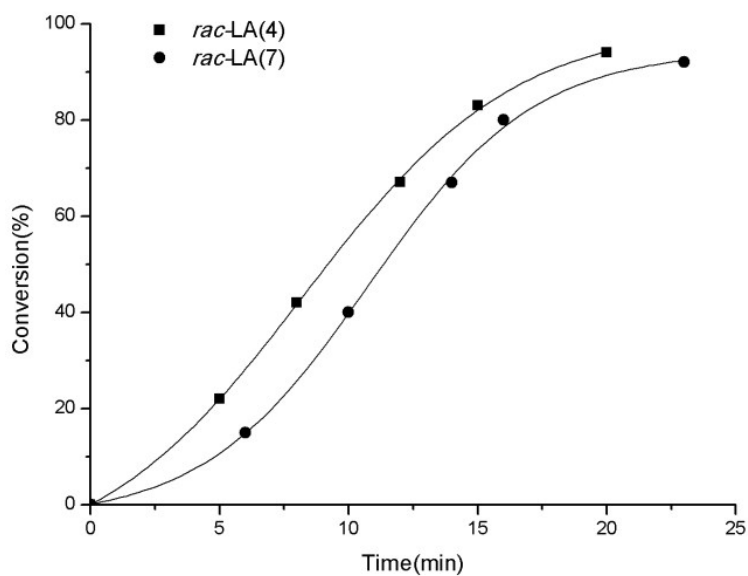

**Figure S29.** *rac*-LA conversion vs time plot using **4** and **7**:  $[\text{M}]_0/[\text{Cat}]_0 = 200$  at  $140\text{ }^\circ\text{C}$

**Table S1.** Polymerization data for *rac*-LA catalyzed by complexes **2**, **3**, **4**, **5**, **8** and **9** in different  $[rac\text{-LA}]_0/[Cat]_0$  ratio at 140 °C

| Entry | Cat.     | $[rac\text{-LA}]_0/[Cat]_0$ | time <sup>a</sup><br>(min) | Yield<br>(%) | $M_n(\text{GPC})^b$<br>(kg/mol) | $M_n^{(\text{theoretical})c}$<br>(kg/mol) | TOF <sup>d</sup><br>(min <sup>-1</sup> ) | $M_w/M_n$ |
|-------|----------|-----------------------------|----------------------------|--------------|---------------------------------|-------------------------------------------|------------------------------------------|-----------|
| 1     | <b>2</b> | 400/1                       | 50                         | 98           | 59.24                           | 57.95                                     | 7.84                                     | 1.08      |
| 2     | <b>2</b> | 800/1                       | 80                         | 97           | 117.05                          | 115.62                                    | 9.70                                     | 1.10      |
| 3     | <b>3</b> | 400/1                       | 50                         | 98           | 55.70                           | 57.95                                     | 7.84                                     | 1.09      |
| 4     | <b>3</b> | 800/1                       | 85                         | 98           | 115.04                          | 115.62                                    | 9.22                                     | 1.12      |
| 5     | <b>5</b> | 400/1                       | 55                         | 98           | 60.03                           | 57.95                                     | 7.13                                     | 1.10      |
| 6     | <b>5</b> | 800/1                       | 90                         | 97           | 118.65                          | 115.62                                    | 8.62                                     | 1.11      |
| 7     | <b>6</b> | 400/1                       | 60                         | 99           | 59.20                           | 57.95                                     | 6.60                                     | 1.08      |
| 8     | <b>6</b> | 800/1                       | 92                         | 97           | 116.42                          | 115.62                                    | 8.43                                     | 1.09      |
| 9     | <b>8</b> | 400/1                       | 70                         | 97           | 56.30                           | 57.95                                     | 5.54                                     | 1.14      |
| 10    | <b>8</b> | 800/1                       | 98                         | 97           | 117.28                          | 115.62                                    | 7.92                                     | 1.15      |
| 11    | <b>9</b> | 400/1                       | 75                         | 98           | 55.83                           | 57.95                                     | 5.23                                     | 1.11      |
| 12    | <b>9</b> | 800/1                       | 105                        | 97           | 116.77                          | 115.62                                    | 7.39                                     | 1.12      |

<sup>a</sup>Time of polymerization was measured by quenching the polymerization reaction when all the monomer were found to be consumed. <sup>b</sup>Measured by GPC at 27 °C in THF relative to polystyrene standards with Mark-Houwink corrections for  $M_n$ . <sup>c</sup> $M_n^{(\text{theoretical})}$  at 100% =  $[M]_0/[C]_0 \times \text{molecular weight of monomer} + \text{molecular weight of end group}$ . <sup>d</sup>TOFs were calculated as (mol of LA consumed) / (mol of catalyst  $\times$  time of polymerization).

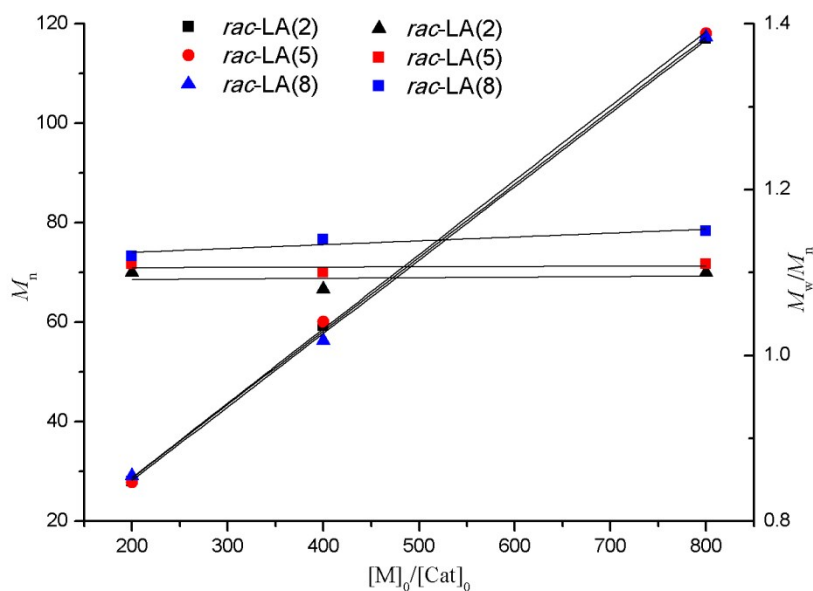

**Figure S30.** Plot of  $M_n$  and MWD vs.  $[M]_0/[Cat]_0$  for *rac*-LA polymerization at 140 °C using **2**, **5** and **8**

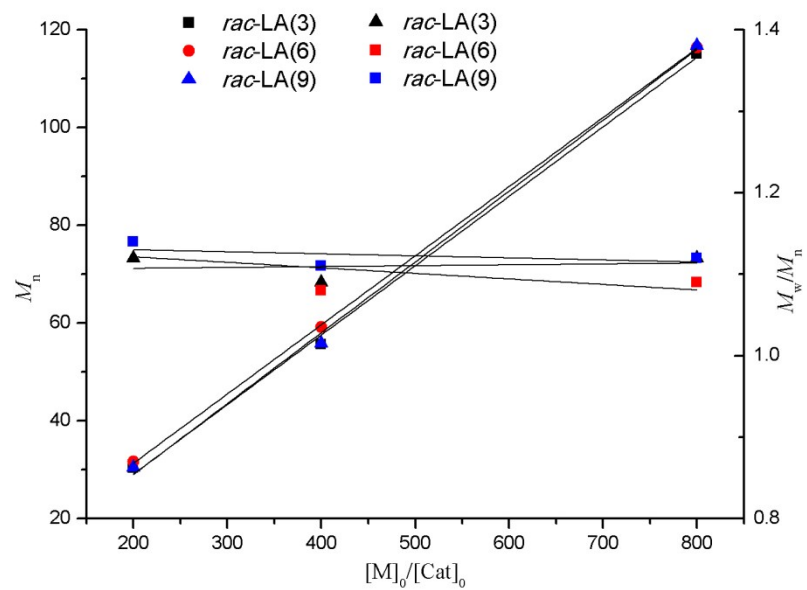

**Figure S31.** Plot of  $M_n$  and MWD vs.  $[M]_0/[Cat]_0$  for *rac*-LA polymerization at 140 °C using **3, 6 and 9**

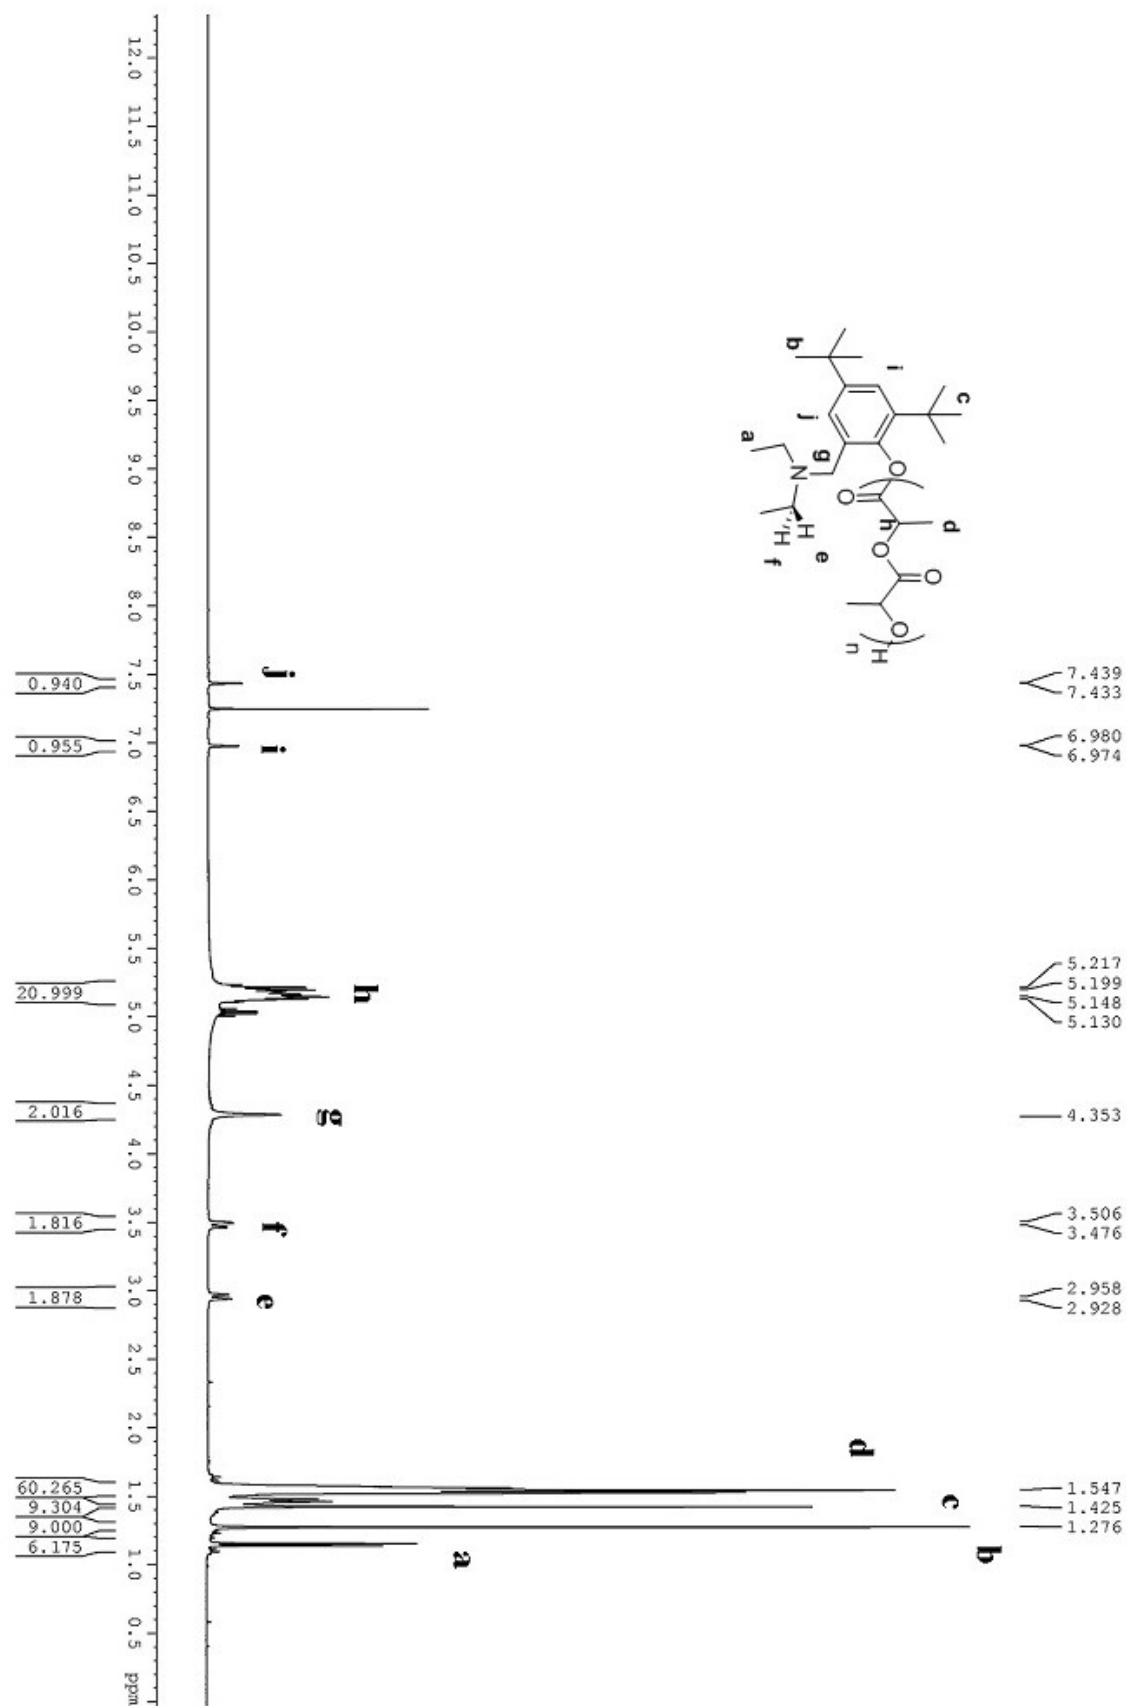

**Figure S32.** <sup>1</sup>H NMR spectrum (500 MHz, CDCl<sub>3</sub>) of the crude product obtained from a reaction between *rac*-LA and **1** in 10:1 ratio at 140 °C



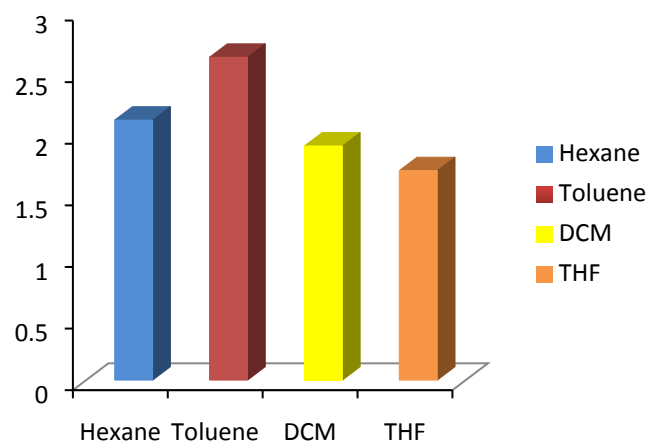

**Figure S33.** Activity of **1** in different solvent in ethylene polymerization

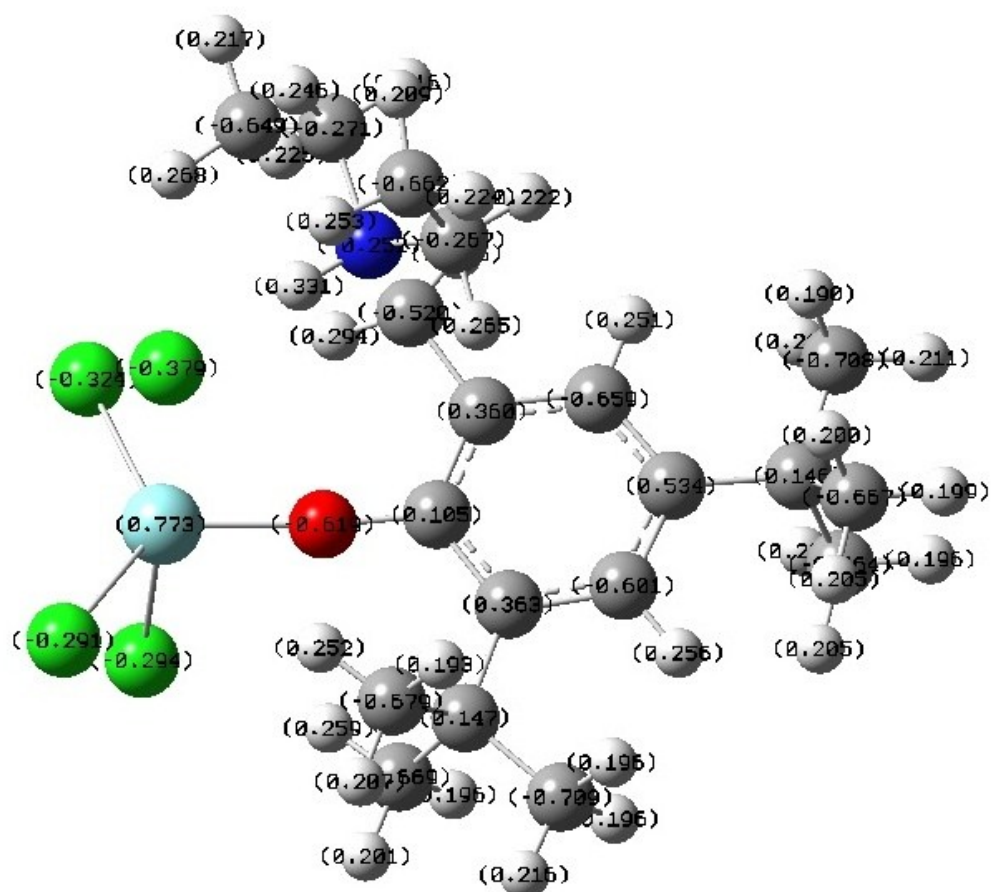

**Figure S34.** Mulliken partial charges of complex **4**

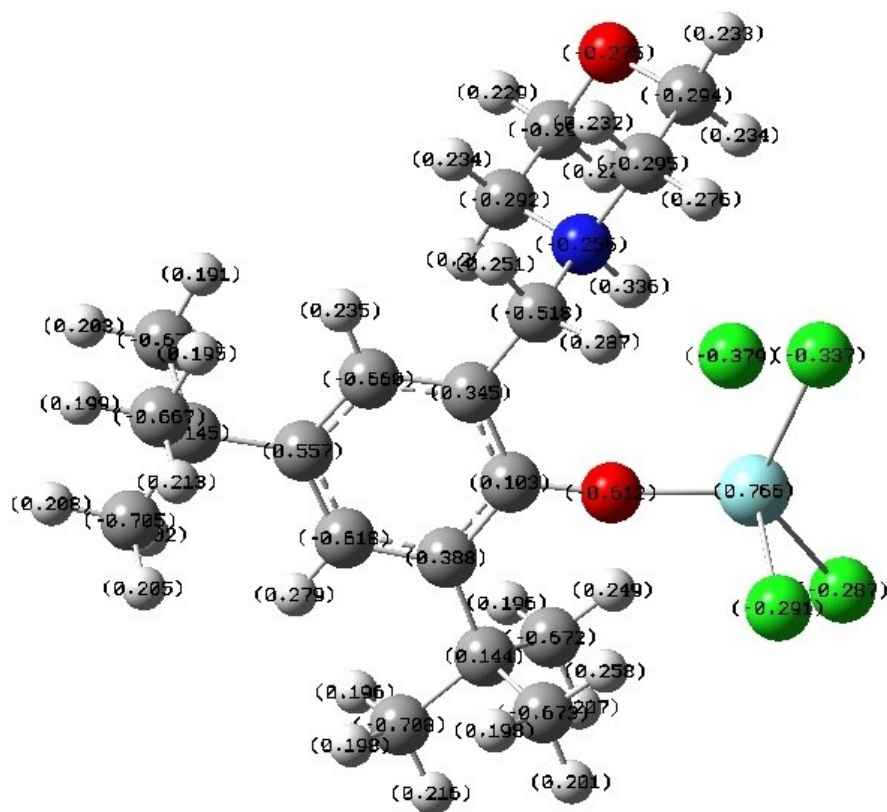

Figure S35. Mulliken partial charges of complex 5

**Table S2.** Selected X-ray and calculated bond lengths and bond angles of **1**, **4** and **5**

| S.<br>No. | Compound | Bond Length (Å) |         |            | Bond Angle (°) |          |            |
|-----------|----------|-----------------|---------|------------|----------------|----------|------------|
|           |          | Entry           | X-ray   | Calculated | Entry          | X-ray    | Calculated |
| 1.        | <b>1</b> | O1-Ti1          | 1.76(7) | 1.75       | O1-Ti1-Cl3     | 116.7(6) | 115.0      |
| 2.        |          | Cl1-Ti1         | 2.31(9) | 2.32       | O1-Ti1-Cl4     | 114.0(6) | 112.8      |
| 3.        |          | Cl2-Ti1         | 2.37(7) | 2.36       | Cl3-Ti1-Cl4    | 129.1(3) | 128.4      |
| 4.        |          | Cl3-Ti1         | 2.28(7) | 2.29       | Cl1-Ti1-Cl2    | 174.8(3) | 175.1      |
| 5.        |          | Cl4-Ti1         | 2.24(6) | 2.25       |                |          |            |
| 6.        | <b>4</b> | O1-Zr1          | 1.95(2) | 1.96       | O1-Zr1-N1      | 176.3(1) | 178.4      |
| 7.        |          | Cl1-Zr1         | 2.43(1) | 2.41       | Cl1-Zr1-Cl2    | 93.3(4)  | 91.7       |
| 8.        |          | Cl2- Zr1        | 2.45(1) | 2.44       | Cl1-Zr1-Cl4    | 89.9(3)  | 88.5       |
| 9.        |          | Cl3- Zr1        | 2.49(1) | 2.48       | Cl2-Zr1-Cl4    | 167.3(4) | 170.4      |
| 10.       |          | Cl4- Zr1        | 2.50(1) | 2.49       |                |          |            |
| 11.       |          | N1- Zr1         | 2.34(3) | 2.36       |                |          |            |
| 12.       | <b>5</b> | O1-Zr1          | 1.92(2) | 1.88       | O1-Zr1-N1      | 168.9(1) | 172.4      |
| 13.       |          | Cl1-Zr1         | 2.51(9) | 2.49       | Cl2-Zr1-Cl3    | 87.1(3)  | 88.2       |
| 14.       |          | Cl2- Zr1        | 2.52(1) | 2.50       | Cl3-Zr1-Cl5    | 85.9(3)  | 87.6       |
| 15.       |          | Cl3- Zr1        | 2.43(1) | 2.44       | Cl5-Zr1-Cl4    | 89.6(3)  | 87.5       |
| 16.       |          | Cl4- Zr1        | 2.44(1) | 2.46       |                |          |            |
| 17.       |          | N1- Zr1         | 2.38(3) | 2.36       |                |          |            |
